# Supplementary material
Source: publisher site journal article supplement (https://www.spandidos-publications.com/6860/downloadSupplementary)
Supplement: Supplementary file 1 [file downloadSupplementary]

## Sheet: Sheet1
Table SΙI. Details of gene expression alterations according to microarray analysis.
Α, Upregulated genes
Gene symbol	Gene name	Fold change	P-value
HIPK2	homeodomain interacting protein kinase 2	2.45±0.32	0.00215455
SCARNA16	small Cajal body-specific RNA 16	2.39±0.07	8.00496e-05
LINC00673	long intergenic non-protein coding RNA 673	1.94±0.14	0.00246975
STXBP5-AS1	STXBP5 antisense RNA 1	3.1±0.4	0.000411149
UBE2E3	ubiquitin-conjugating enzyme E2E 3	1.91±0.26	0.00302567
RNF139-AS1	RNF139 antisense RNA 1 (head to head)	1.66±0.14	0.0482545
LOC100289026	putative uncharacterized protein FLJ00310-like	1.59±0.06	0.00190891
LINC01564	long intergenic non-protein coding RNA 1564	2.23±0.79	0.159187
LOC101929709	uncharacterized LOC101929709	1.69±0.11	0.00109325
MIR503HG	MIR503 host gene (non-protein coding)	1.88±0.37	0.00408187
PARP9	poly (ADP-ribose) polymerase family, member 9	1.87±0.39	0.0119412
SAP25	Sin3A-associated protein, 25kDa	1.92±0.19	0.0494109
SNORD46	small nucleolar RNA, C/D box 46	2.05±0.39	0.00750026
SNORA21	small nucleolar RNA, H/ACA box 21	2.47±0.29	0.000284461
SNORA63	small nucleolar RNA, H/ACA box 63	2.55±0.29	0.00238561
SNORA4	small nucleolar RNA, H/ACA box 4	2.03±0.04	0.000267034
SNORA48	small nucleolar RNA, H/ACA box 48	3.27±0.22	0.000429832
SNORA44	small nucleolar RNA, H/ACA box 44	2.06±0.43	0.0252442
RPL32	ribosomal protein L32	1.8±0.15	0.000246399
SCARNA20	small Cajal body-specific RNA 20	4.41±0.06	6.29864e-06
SCARNA8	small Cajal body-specific RNA 8	4.38±2.62	0.041276
SNORD71	small nucleolar RNA, C/D box 71	2.02±0.14	0.0050589
SCARNA18	small Cajal body-specific RNA 18	2.57±0.42	0.0161885
SNORA11B	small nucleolar RNA, H/ACA box 11B	1.97±0.28	0.0108284
SNORA11C	small nucleolar RNA, H/ACA box 11C	2.01±0.25	0.00350281
SNORA11D	small nucleolar RNA, H/ACA box 11D	3.02±0.19	0.000293882
SNORA57	small nucleolar RNA, H/ACA box 57	1.7±0.06	0.00195815
RNU6ATAC	RNA, U6atac small nuclear (U12-dependent splicing)	1.57±0.02	4.54559e-05
LIMS3-LOC440895	LIMS3-LOC440895 readthrough	1.8±0.26	0.0107999
MT1E	metallothionein 1E	2.19±0.17	0.00199873
LINC00672	long intergenic non-protein coding RNA 672	2.05±0.28	0.0343094
LOC101927244	uncharacterized LOC101927244	1.92±0.18	0.000707208
LUCAT1	lung cancer associated transcript 1 (non-protein coding)	2.61±0.32	0.0119105
LUCAT1	lung cancer associated transcript 1 (non-protein coding)	2.03±0.45	0.0134769
LUCAT1	lung cancer associated transcript 1 (non-protein coding)	2.45±0.26	0.0055199
LINC00704	long intergenic non-protein coding RNA 704	2.19±0.57	0.0291607
LINC00844	long intergenic non-protein coding RNA 844	2.32±1	0.0446209
SPG7	spastic paraplegia 7 (pure and complicated autosomal recessive)	1.7±0.13	0.00509515
LOC100507520	uncharacterized LOC100507520	2.27±0.83	0.0587499
RAB27B	RAB27B, member RAS oncogene family	2.08±0.11	1.16112e-05
LYPLAL1-AS1	LYPLAL1 antisense RNA 1 (head to head)	3.45±1.09	0.00767495
LOC643733	caspase 4, apoptosis-related cysteine peptidase pseudogene	1.74±0.07	0.000345728
WHAMMP1	WAS protein homolog associated with actin, golgi membranes and microtubules pseudogene 1	1.6±0.04	0.00350263
LOC102725407	uncharacterized LOC102725407	2.13±0.29	0.0167306
GS1-259H13.2	transmembrane protein 225-like	1.71±0.07	0.00965382
LOC101929947	uncharacterized LOC101929947	1.88±0.19	0.00971563
LOC100507520	uncharacterized LOC100507520	1.74±0.14	0.0300226
ADAM12	ADAM metallopeptidase domain 12	2.89±0.27	0.000419003
ORAI3	ORAI calcium release-activated calcium modulator 3	1.6±0.07	0.000339542
LINC00704	long intergenic non-protein coding RNA 704	2.07±0.18	0.00769223
PSMD6-AS2	PSMD6 antisense RNA 2	1.86±0.14	0.0280798
SLC7A11-AS1	SLC7A11 antisense RNA 1	1.8±0.13	0.00989597
CCDC144NL-AS1	CCDC144NL antisense RNA 1	1.6±0.09	0.0715444
SCARNA10	small Cajal body-specific RNA 10	2.65±0.4	0.00672185
LOC100129781	uncharacterized LOC100129781	2.12±0.02	2.73894e-05
FGD5-AS1	FGD5 antisense RNA 1	2.5±0.1	0.000879796
MT1B	metallothionein 1B	1.94±0.06	0.00398351
MIR503HG	MIR503 host gene (non-protein coding)	2.11±0.37	0.0197458
BTG1	B-cell translocation gene 1, anti-proliferative	1.7±0.04	4.78104e-06
LOC101928433	uncharacterized LOC101928433	1.68±0.07	0.0112123
C3orf80	chromosome 3 open reading frame 80	3.57±0.2	2.17872e-05
LOC101928820	uncharacterized LOC101928820	2.31±0.27	0.00951102
FLJ27255	uncharacterized LOC401281	1.86±0.08	0.00210354
ZCCHC2	zinc finger, CCHC domain containing 2	1.8±0.16	0.00169268
NKIRAS2	NFKB inhibitor interacting Ras-like 2	1.58±0.05	0.00194342
SMOX	spermine oxidase	1.79±0.13	0.00360314
MFAP2	microfibrillar-associated protein 2	1.86±0.16	0.000731763
PNRC2	proline-rich nuclear receptor coactivator 2	1.6±0.05	0.000608383
CFHR3	complement factor H-related 3	1.91±0.15	0.00500887
DDIT4	DNA-damage-inducible transcript 4	1.77±0.1	0.00034376
EPSTI1	epithelial stromal interaction 1 (breast)	5.21±2.58	0.0233231
RAB27B	RAB27B, member RAS oncogene family	2.05±0.14	0.000242715
BFSP1	beaded filament structural protein 1, filensin	1.9±0.2	0.000523339
HERC5	HECT and RLD domain containing E3 ubiquitin protein ligase 5	4.95±1.8	0.0028683
PARP12	poly (ADP-ribose) polymerase family, member 12	1.98±0.23	0.000190558
IDO1	indoleamine 2,3-dioxygenase 1	2.71±0.19	0.0016126
CFH	complement factor H	2.05±0.13	0.000480322
RGS2	regulator of G-protein signaling 2	2.77±0.58	0.00709404
EIF4EBP2	eukaryotic translation initiation factor 4E binding protein 2	2.17±0.11	3.22463e-05
LGALS9	lectin, galactoside-binding, soluble, 9	1.91±0.21	0.000442326
RASD1	RAS, dexamethasone-induced 1	2.24±0.5	0.00528742
SP110	SP110 nuclear body protein	1.77±0.16	0.00767007
BAZ2B	bromodomain adjacent to zinc finger domain, 2B	1.81±0.09	0.000169153
ACSS1	acyl-CoA synthetase short-chain family member 1	1.91±0.05	0.000460801
TNFSF10	tumor necrosis factor (ligand) superfamily, member 10	2.4±0.88	0.012207
PARP8	poly (ADP-ribose) polymerase family, member 8	1.62±0.13	0.00130433
VNN2	vanin 2	1.93±0.22	0.00351376
AVL9	AVL9 homolog (S. cerevisiase)	1.66±0.06	0.00187768
TNFSF4	tumor necrosis factor (ligand) superfamily, member 4	1.68±0.16	0.0224328
FRAT2	frequently rearranged in advanced T-cell lymphomas 2	2.11±0.19	0.000249677
KCNJ14	potassium channel, inwardly rectifying subfamily J, member 14	1.84±0.19	0.000298727
NR4A2	nuclear receptor subfamily 4, group A, member 2	2.79±0.76	0.00371509
USP18	ubiquitin specific peptidase 18	3.18±0.8	0.00913874
RBM47	RNA binding motif protein 47	1.59±0.13	0.0142282
PSORS1C1	psoriasis susceptibility 1 candidate 1	1.97±0.15	0.00482886
CNKSR3	CNKSR family member 3	1.64±0.07	0.00151322
SLC18B1	solute carrier family 18, subfamily B, member 1	1.76±0.05	0.000244313
MAP3K5	mitogen-activated protein kinase kinase kinase 5	1.98±0.21	0.00539942
SOD2	superoxide dismutase 2, mitochondrial	1.77±0.22	0.00457839
RNF122	ring finger protein 122	1.95±0.04	4.7005e-05
PLIN2	perilipin 2	1.81±0.07	0.00165351
ST3GAL5	ST3 beta-galactoside alpha-2,3-sialyltransferase 5	1.6±0.1	0.00164662
FAM60A	family with sequence similarity 60, member A	2±0.4	0.0218609
SAT1	spermidine/spermine N1-acetyltransferase 1	1.82±0.11	0.001172
ID3	inhibitor of DNA binding 3, dominant negative helix-loop-helix protein	1.8±0.25	0.0254954
DUSP6	dual specificity phosphatase 6	1.9±0.14	0.00030841
CDK8	cyclin-dependent kinase 8	1.61±0.13	0.00844372
FAM222B	family with sequence similarity 222, member B	1.66±0.11	0.00606522
TNFSF13B	tumor necrosis factor (ligand) superfamily, member 13b	1.99±0.25	0.00589582
ARID5A	AT rich interactive domain 5A (MRF1-like)	2.21±0.26	0.000274737
ADAM17	ADAM metallopeptidase domain 17	1.76±0.15	0.000186773
SPRY1	sprouty homolog 1, antagonist of FGF signaling (Drosophila)	1.86±0.4	0.0794429
GCLC	glutamate-cysteine ligase, catalytic subunit	1.71±0.06	0.00585703
TPK1	thiamin pyrophosphokinase 1	1.79±0.08	0.00191692
TOR4A	torsin family 4, member A	1.92±0.06	0.000822952
LYN	LYN proto-oncogene, Src family tyrosine kinase	1.56±0.05	0.00173009
EPHA5	EPH receptor A5	1.97±0.25	0.0159506
EPHA2	EPH receptor A2	2.1±0.21	0.00318089
HIST2H2BE	histone cluster 2, H2be	1.76±0.27	0.0427342
LMBR1L	limb development membrane protein 1-like	1.9±0.22	0.00184225
ARHGDIB	Rho GDP dissociation inhibitor (GDI) beta	2.67±0.24	0.00247294
YPEL3	yippee-like 3 (Drosophila)	1.63±0.06	1.46345e-05
MT1F	metallothionein 1F	3.74±0.6	0.000696435
C17orf59	chromosome 17 open reading frame 59	1.62±0.03	5.25575e-06
NMI	N-myc (and STAT) interactor	1.75±0.04	0.000251967
CYP2D6	cytochrome P450, family 2, subfamily D, polypeptide 6	1.91±0.36	0.0492488
TMEM101	transmembrane protein 101	1.61±0.04	0.000205099
ROR2	receptor tyrosine kinase-like orphan receptor 2	1.92±0.51	0.0627562
MMP3	matrix metallopeptidase 3 (stromelysin 1, progelatinase)	1.6±0.12	0.00666698
NID2	nidogen 2 (osteonidogen)	1.71±0.1	0.000181909
TNFAIP6	tumor necrosis factor, alpha-induced protein 6	2.28±0.2	0.00171352
RTP4	receptor (chemosensory) transporter protein 4	2.94±0.52	0.00231201
DOCK10	dedicator of cytokinesis 10	1.53±0.02	0.00087787
TP53INP1	tumor protein p53 inducible nuclear protein 1	2.36±0.33	0.00344795
HTR2B	5-hydroxytryptamine (serotonin) receptor 2B, G protein-coupled	2.23±0.56	0.0158612
ZNF608	zinc finger protein 608	2.04±0.35	0.000942535
IL1RAP	interleukin 1 receptor accessory protein	1.64±0.1	0.00740738
MAFB	v-maf avian musculoaponeurotic fibrosarcoma oncogene homolog B	1.62±0.1	0.00367097
MX1	MX dynamin-like GTPase 1	8.22±4.66	0.0304639
CPA3	carboxypeptidase A3 (mast cell)	3.85±0.37	0.00138956
PPARGC1A	peroxisome proliferator-activated receptor gamma, coactivator 1 alpha	2.39±0.22	0.000499095
RARRES3	retinoic acid receptor responder (tazarotene induced) 3	1.73±0.12	0.00903405
IGF2BP3	insulin-like growth factor 2 mRNA binding protein 3	1.55±0.02	0.000105299
IFI6	interferon, alpha-inducible protein 6	3.26±1.92	0.0802432
PPIF	peptidylprolyl isomerase F	2.17±0.08	6.19803e-05
HKDC1	hexokinase domain containing 1	1.81±0.08	0.000273788
CASP1	caspase 1, apoptosis-related cysteine peptidase	2.02±0.13	0.00243451
OAS2	2'-5'-oligoadenylate synthetase 2, 69/71kDa	5.45±2.62	0.0180946
MGP	matrix Gla protein	2.48±0.24	0.00312152
TDG	thymine-DNA glycosylase	1.59±0.02	0.00110964
FOXG1	forkhead box G1	2.96±0.72	0.00138034
CLEC18B	C-type lectin domain family 18, member B	2.18±0.32	0.0115183
MT1E	metallothionein 1E	2.05±0.1	0.000954816
ABCC3	ATP-binding cassette, sub-family C (CFTR/MRP), member 3	2.37±0.3	0.0109358
ZNF432	zinc finger protein 432	1.96±0.4	0.0291547
AUH	AU RNA binding protein/enoyl-CoA hydratase	1.7±0.14	0.0001322
ANKRD44	ankyrin repeat domain 44	2±0.34	0.0248635
PAX3	paired box 3	1.59±0.07	0.000899075
PTPN18	protein tyrosine phosphatase, non-receptor type 18 (brain-derived)	1.53±0.02	0.000195828
CDC25B	cell division cycle 25B	1.93±0.1	0.000279114
BACH1	BTB and CNC homology 1, basic leucine zipper transcription factor 1	1.73±0.08	0.000239828
BRWD1	bromodomain and WD repeat domain containing 1	1.96±0.16	0.00403553
CBLB	Cbl proto-oncogene B, E3 ubiquitin protein ligase	2.33±0.04	3.9172e-05
RNF44	ring finger protein 44	1.94±0.05	3.87299e-05
AHNAK	AHNAK nucleoprotein	1.75±0.02	0.00145928
PAIP2	poly(A) binding protein interacting protein 2	1.57±0.06	0.000718555
PODXL	podocalyxin-like	2.01±0.16	0.00485697
ELN	elastin	1.72±0.19	0.00994775
ASPN	asporin	3.13±0.25	0.00622307
CDKN2B	cyclin-dependent kinase inhibitor 2B (p15, inhibits CDK4)	2.27±0.26	0.00526696
PRKX	protein kinase, X-linked	1.62±0.08	0.000800905
TNFRSF6B	tumor necrosis factor receptor superfamily, member 6b, decoy	1.78±0.2	0.0111758
CPT1B	carnitine palmitoyltransferase 1B (muscle)	2.05±0.14	0.00870277
IFI44	interferon-induced protein 44	1.81±0.29	0.00203371
IFIT2	interferon-induced protein with tetratricopeptide repeats 2	2.56±0.6	0.00386215
C11orf57	chromosome 11 open reading frame 57	1.67±0.1	0.00482295
IGF2BP2	insulin-like growth factor 2 mRNA binding protein 2	1.66±0.17	0.000381246
LRRC8A	leucine rich repeat containing 8 family, member A	1.56±0.06	0.000835633
HERC6	HECT and RLD domain containing E3 ubiquitin protein ligase family member 6	3.73±1.22	0.00900301
FILIP1L	filamin A interacting protein 1-like	1.64±0.05	0.00411332
LRRC17	leucine rich repeat containing 17	1.71±0.05	0.00109517
CPE	carboxypeptidase E	1.66±0.04	0.000428758
SATB1	SATB homeobox 1	1.88±0.09	0.00139281
IL27RA	interleukin 27 receptor, alpha	1.69±0.16	0.0208014
SLC23A3	solute carrier family 23, member 3	1.81±0.34	0.0511083
PLEKHB2	pleckstrin homology domain containing, family B (evectins) member 2	1.6±0.07	0.00169515
DNMT3B	DNA (cytosine-5-)-methyltransferase 3 beta	1.82±0.02	0.00170017
NPAS3	neuronal PAS domain protein 3	2.78±0.79	0.0225679
CBLB	Cbl proto-oncogene B, E3 ubiquitin protein ligase	2.1±0.2	0.00682695
TLR3	toll-like receptor 3	1.85±0.13	0.00748707
DDX60L	DEAD (Asp-Glu-Ala-Asp) box polypeptide 60-like	2.1±0.18	0.00287296
C3orf80	chromosome 3 open reading frame 80	3.81±0.74	0.00895267
GALNT1	polypeptide N-acetylgalactosaminyltransferase 1	1.83±0.1	0.000226512
FAM84A	family with sequence similarity 84, member A	1.9±0.26	0.118573
TNFRSF21	tumor necrosis factor receptor superfamily, member 21	1.68±0.16	0.00563212
HIST2H2AA4	histone cluster 2, H2aa4	1.85±0.09	0.00446435
ESR1	estrogen receptor 1	2.05±0.19	0.0119186
CCDC28A	coiled-coil domain containing 28A	2±0.08	0.000345565
COL21A1	collagen, type XXI, alpha 1	2.31±0.32	0.0119421
CXCL2	chemokine (C-X-C motif) ligand 2	3.1±0.51	0.0117285
MEF2C	myocyte enhancer factor 2C	1.67±0.17	0.0155588
TMEM71	transmembrane protein 71	1.89±0.34	0.0102726
ISG20	interferon stimulated exonuclease gene 20kDa	1.71±0.08	0.00140119
GATS	GATS, stromal antigen 3 opposite strand	1.78±0.1	0.00106709
LCOR	ligand dependent nuclear receptor corepressor	1.65±0.09	0.000587931
KCNJ2	potassium channel, inwardly rectifying subfamily J, member 2	1.78±0.1	0.00934845
TTYH3	tweety family member 3	1.71±0.13	0.00597081
FAM167A	family with sequence similarity 167, member A	2.94±0.2	0.000111488
GXYLT1	glucoside xylosyltransferase 1	2.55±0.07	0.000209342
CD163	CD163 molecule	2.02±0.17	0.00783369
PPFIBP1	PTPRF interacting protein, binding protein 1 (liprin beta 1)	1.63±0.06	0.00140395
CHFR	checkpoint with forkhead and ring finger domains, E3 ubiquitin protein ligase	1.72±0.19	0.00329772
ATF3	activating transcription factor 3	2.69±0.47	0.00309087
TRIML2	tripartite motif family-like 2	2.61±0.16	0.00247807
SESN2	sestrin 2	1.65±0.11	0.00687445
ST8SIA1	ST8 alpha-N-acetyl-neuraminide alpha-2,8-sialyltransferase 1	2.08±0.42	0.04453
CYP3A7	cytochrome P450, family 3, subfamily A, polypeptide 7	2.41±0.41	0.01186
CASP4	caspase 4, apoptosis-related cysteine peptidase	1.72±0.07	0.00190928
KDM7A	lysine (K)-specific demethylase 7A	1.84±0.15	0.00482927
SESN3	sestrin 3	1.79±0.09	0.00183812
ATG16L2	autophagy related 16-like 2 (S. cerevisiae)	1.91±0.3	0.0293254
SLC16A11	solute carrier family 16, member 11	1.65±0.11	0.0108377
APAF1	apoptotic peptidase activating factor 1	2.15±0.13	0.00584114
GIMAP2	GTPase, IMAP family member 2	2.53±0.17	0.00079717
PCED1B	PC-esterase domain containing 1B	1.68±0.05	0.000662413
BATF2	basic leucine zipper transcription factor, ATF-like 2	3.62±1.06	0.00466153
KRT18P55	keratin 18 pseudogene 55	2.44±0.5	0.00890791
BMF	Bcl2 modifying factor	3.9±0.99	0.00547852
MT1B	metallothionein 1B	1.93±0.12	0.00412324
EMCN	endomucin	1.91±0.14	0.00271913
BBC3	BCL2 binding component 3	2.1±0.11	0.000249177
DHX58	DEXH (Asp-Glu-X-His) box polypeptide 58	1.74±0.14	0.000212357
SMCO2	single-pass membrane protein with coiled-coil domains 2	1.6±0.04	0.0368283
SPATA13	spermatogenesis associated 13	1.61±0.08	0.000523403
AK9	adenylate kinase 9	2.34±1	0.0600947
BST2	bone marrow stromal cell antigen 2	3.24±1.84	0.0543356
CREG2	cellular repressor of E1A-stimulated genes 2	1.77±0.36	0.0189359
KDM3A	lysine (K)-specific demethylase 3A	1.63±0.15	0.00122563
PCGF3	polycomb group ring finger 3	1.56±0.01	0.00271471
FZD8	frizzled class receptor 8	2.3±0.07	0.000137089
HDAC9	histone deacetylase 9	1.83±0.18	0.0158803
S1PR1	sphingosine-1-phosphate receptor 1	3.48±0.67	0.00852594
MXD1	MAX dimerization protein 1	1.69±0.11	0.00466305
C12orf76	chromosome 12 open reading frame 76	2.29±0.22	0.00343704
SLC39A8	solute carrier family 39 (zinc transporter), member 8	1.67±0.12	0.00120318
DDX60	DEAD (Asp-Glu-Ala-Asp) box polypeptide 60	2.6±0.4	0.00173555
GSAP	gamma-secretase activating protein	1.8±0.03	0.00115995
IFFO2	intermediate filament family orphan 2	1.94±0.06	0.000777192
CARD6	caspase recruitment domain family, member 6	1.57±0	4.83134e-06
BTBD11	BTB (POZ) domain containing 11	2.03±0.21	0.00255193
PPT2	palmitoyl-protein thioesterase 2	1.91±0.01	2.21751e-06
CABLES1	Cdk5 and Abl enzyme substrate 1	1.83±0.05	3.92665e-05
ETV7	ets variant 7	2.59±0.38	0.0109841
PHC2	polyhomeotic homolog 2 (Drosophila)	1.68±0.19	0.0013977
MT1L	metallothionein 1L (gene/pseudogene)	1.9±0.16	0.00429944
CDKN1C	cyclin-dependent kinase inhibitor 1C (p57, Kip2)	2.21±0.19	8.93449e-05
HIST1H2AD	histone cluster 1, H2ad	1.76±0.09	0.00467988
RGS4	regulator of G-protein signaling 4	1.68±0.21	0.00575078
KLF11	Kruppel-like factor 11	1.84±0.08	0.000935388
ABCC2	ATP-binding cassette, sub-family C (CFTR/MRP), member 2	2.11±0.68	0.0519499
PPP1R14C	protein phosphatase 1, regulatory (inhibitor) subunit 14C	1.7±0.1	0.0202172
IFI44L	interferon-induced protein 44-like	6.7±2.53	0.0049459
EGR2	early growth response 2	2.33±0.7	0.0452712
CASP5	caspase 5, apoptosis-related cysteine peptidase	1.78±0.06	0.000135406
LRIG3	leucine-rich repeats and immunoglobulin-like domains 3	1.53±0.05	0.000864063
HOXA9	homeobox A9	1.56±0.05	0.00163685
FAXDC2	fatty acid hydroxylase domain containing 2	1.59±0.07	0.00137832
PHF10	PHD finger protein 10	1.54±0.05	0.00138351
PTPRB	protein tyrosine phosphatase, receptor type, B	2.57±0.81	0.0519897
MT1A	metallothionein 1A	1.84±0.15	0.00826084
ITGA3	integrin, alpha 3 (antigen CD49C, alpha 3 subunit of VLA-3 receptor)	1.83±0.18	0.00201624
ZNF652	zinc finger protein 652	1.79±0.09	4.8051e-05
SFT2D3	SFT2 domain containing 3	1.86±0.09	0.00258373
RELB	v-rel avian reticuloendotheliosis viral oncogene homolog B	2.07±0.14	0.00183832
HNMT	histamine N-methyltransferase	1.69±0.04	0.00556813
TAP1	transporter 1, ATP-binding cassette, sub-family B (MDR/TAP)	1.7±0.06	0.000206101
HIST1H2AE	histone cluster 1, H2ae	1.65±0.05	0.00237977
HECA	headcase homolog (Drosophila)	1.81±0.05	0.000285429
DOCK4	dedicator of cytokinesis 4	1.68±0.03	9.28748e-05
TOR2A	torsin family 2, member A	2.14±0.11	0.000166348
TNK2	tyrosine kinase, non-receptor, 2	1.69±0.18	0.013296
MX2	MX dynamin-like GTPase 2	3.66±1.57	0.0382023
FAS	Fas cell surface death receptor	1.53±0.04	0.00174219
MTMR2	myotubularin related protein 2	1.79±0.11	0.00102883
HTATIP2	HIV-1 Tat interactive protein 2, 30kDa	1.73±0.03	4.00346e-07
CARD16	caspase recruitment domain family, member 16	2.05±0.06	0.000481864
SMAGP	small cell adhesion glycoprotein	1.62±0.13	0.0182439
MT1M	metallothionein 1M	2.18±0.14	0.000382837
EVI2B	ecotropic viral integration site 2B	4.25±1.69	0.0152705
IFIH1	interferon induced with helicase C domain 1	2.17±0.45	0.00220833
PLSCR1	phospholipid scramblase 1	2.69±0.44	0.000352025
AGPAT9	1-acylglycerol-3-phosphate O-acyltransferase 9	4.24±0.48	1.6205e-05
CXCL1	chemokine (C-X-C motif) ligand 1 (melanoma growth stimulating activity, alpha)	1.83±0.38	0.0356657
SMPDL3A	sphingomyelin phosphodiesterase, acid-like 3A	1.74±0.11	0.000197361
SNX4	sorting nexin 4	1.73±0.15	0.00353487
IFITM1	interferon induced transmembrane protein 1	6.69±4.39	0.0359596
SPP1	secreted phosphoprotein 1	1.69±0.06	0.00135653
NR0B1	nuclear receptor subfamily 0, group B, member 1	2.4±0.11	0.00132113
STK40	serine/threonine kinase 40	2.51±0.05	5.83378e-05
GBP5	guanylate binding protein 5	2.65±0.39	0.00198363
G0S2	G0/G1 switch 2	1.84±0.25	0.00789313
RCC2	regulator of chromosome condensation 2	1.91±0.06	0.00015732
SLC3A2	solute carrier family 3 (amino acid transporter heavy chain), member 2	1.87±0.1	0.000952608
TMEM88	transmembrane protein 88	1.88±0.29	0.0222112
EVI2A	ecotropic viral integration site 2A	1.81±0.1	0.000120693
STON1-GTF2A1L	STON1-GTF2A1L readthrough	1.65±0.08	0.000577435
ENTPD6	ectonucleoside triphosphate diphosphohydrolase 6 (putative)	1.67±0.04	0.000689842
PLCL2	phospholipase C-like 2	1.79±0.09	0.00240605
ADH1C	alcohol dehydrogenase 1C (class I), gamma polypeptide	2.89±0.9	0.0307161
MAT2B	methionine adenosyltransferase II, beta	1.6±0.07	0.0029624
CTDSP2	CTD (carboxy-terminal domain, RNA polymerase II, polypeptide A) small phosphatase 2	1.62±0.07	5.23319e-05
ISG15	ISG15 ubiquitin-like modifier	2.38±0.64	0.0083417
IGF2BP1	insulin-like growth factor 2 mRNA binding protein 1	1.87±0.04	0.000243959
CYTH1	cytohesin 1	1.72±0.11	0.0012407
LIPH	lipase, member H	1.93±0.35	0.00360179
GBP2	guanylate binding protein 2, interferon-inducible	1.7±0.03	0.000162146
SORL1	sortilin-related receptor, L(DLR class) A repeats containing	1.65±0.02	0.00275051
LPXN	leupaxin	1.57±0.02	0.000376269
BTG1	B-cell translocation gene 1, anti-proliferative	1.78±0.1	4.88062e-05
CYP3A5	cytochrome P450, family 3, subfamily A, polypeptide 5	2.3±0.22	0.0012394
IKBKE	inhibitor of kappa light polypeptide gene enhancer in B-cells, kinase epsilon	1.78±0.14	0.00806697
IL7	interleukin 7	1.95±0.12	0.00106515
ECE2	endothelin converting enzyme 2	1.81±0.09	0.000553726
CASP3	caspase 3, apoptosis-related cysteine peptidase	1.81±0.15	0.000726596
SESN1	sestrin 1	1.77±0.06	0.000154887
AKR1B10	aldo-keto reductase family 1, member B10 (aldose reductase)	4.28±0.3	9.28123e-05
ANKRD46	ankyrin repeat domain 46	1.79±0.09	0.00255388
HMGA2	high mobility group AT-hook 2	1.95±0.06	0.00152843
TMEM164	transmembrane protein 164	1.85±0.05	8.53563e-05
PAQR6	progestin and adipoQ receptor family member VI	2.21±0.45	0.0251547
TXNIP	thioredoxin interacting protein	2±0.1	0.00182838
PTEN	phosphatase and tensin homolog	1.7±0.06	0.00118305
KIAA1551	KIAA1551	1.65±0.14	0.00155976
ZFP36L1	ZFP36 ring finger protein-like 1	1.59±0.04	0.000389305
SLC7A7	solute carrier family 7 (amino acid transporter light chain, y+L system), member 7	1.94±0.17	0.00059841
MESDC1	mesoderm development candidate 1	1.89±0.09	1.50993e-05
NEDD4L	neural precursor cell expressed, developmentally down-regulated 4-like, E3 ubiquitin protein ligase	2.06±0.1	0.00101406
ENTPD7	ectonucleoside triphosphate diphosphohydrolase 7	1.99±0.21	0.000357813
EIF4EBP2	eukaryotic translation initiation factor 4E binding protein 2	1.77±0.13	0.000231344
GADD45G	growth arrest and DNA-damage-inducible, gamma	1.77±0.15	0.0155397
BCL2L11	BCL2-like 11 (apoptosis facilitator)	2.24±0.28	0.00429026
AKR1B10	aldo-keto reductase family 1, member B10 (aldose reductase)	4.13±0.39	0.000163076
BMP1	bone morphogenetic protein 1	1.6±0.04	0.000949393
HBEGF	heparin-binding EGF-like growth factor	1.61±0.07	0.105774
ZDHHC11	zinc finger, DHHC-type containing 11	1.96±0.26	0.0147197
PARP14	poly (ADP-ribose) polymerase family, member 14	2.1±0.08	4.48975e-06
TMEM64	transmembrane protein 64	1.83±0.24	0.00386349
FAM134C	family with sequence similarity 134, member C	1.77±0.06	1.62705e-05
CARD17	caspase recruitment domain family, member 17	1.99±0.12	0.000932202
UBALD2	UBA-like domain containing 2	1.58±0.04	0.000564399
RASSF9	Ras association (RalGDS/AF-6) domain family (N-terminal) member 9	2.2±0.36	0.0255267
TSC22D4	TSC22 domain family, member 4	1.61±0.1	0.000557845
PLEKHJ1	pleckstrin homology domain containing, family J member 1	1.77±0.03	0.000758395
C1QTNF6	C1q and tumor necrosis factor related protein 6	1.89±0.18	0.00943146
ARRDC2	arrestin domain containing 2	1.91±0.34	0.000911782
PP12613	uncharacterized LOC100192379	1.72±0.3	0.0218586
CLEC2D	C-type lectin domain family 2, member D	1.71±0.16	0.0371619
JUNB	jun B proto-oncogene	1.92±0.27	0.000361109
CTSS	cathepsin S	1.68±0.09	0.00542139
PDK4	pyruvate dehydrogenase kinase, isozyme 4	2.01±0.34	0.0772754
CXCL2	chemokine (C-X-C motif) ligand 2	2.54±0.45	0.0151486
RRAD	Ras-related associated with diabetes	2.8±0.07	4.7824e-07
IFI27	interferon, alpha-inducible protein 27	2.87±1.47	0.0532659
ARRDC3	arrestin domain containing 3	2.51±0.24	2.20977e-05
LYPLA2	lysophospholipase II	1.72±0.19	0.0135395
GMPR	guanosine monophosphate reductase	1.76±0.06	8.62877e-06
PURB	purine-rich element binding protein B	1.56±0.07	0.00341215
MAPK8	mitogen-activated protein kinase 8	2.25±0.28	0.0023395
SYNJ2	synaptojanin 2	1.69±0.1	0.0132577
ATXN1	ataxin 1	1.93±0.06	0.000633188
ADAM8	ADAM metallopeptidase domain 8	2.53±0.1	0.0050656
SOX11	SRY (sex determining region Y)-box 11	1.78±0.03	0.0362955
IFIT2	interferon-induced protein with tetratricopeptide repeats 2	2.57±0.46	0.00048044
FAM209A	family with sequence similarity 209, member A	2.33±0.47	0.00256201
KALRN	kalirin, RhoGEF kinase	2.52±1.16	0.0501876
OAS3	2'-5'-oligoadenylate synthetase 3, 100kDa	3.68±1.87	0.0191819
SLC7A5	solute carrier family 7 (amino acid transporter light chain, L system), member 5	1.75±0.06	0.00135095
KLHDC3	kelch domain containing 3	2.22±0.14	0.00042634
FLI1	Fli-1 proto-oncogene, ETS transcription factor	1.87±0.12	3.2494e-05
HEXIM1	hexamethylene bis-acetamide inducible 1	1.77±0.04	0.000603396
OR5H1	olfactory receptor, family 5, subfamily H, member 1	1.61±0.09	0.0613685
SLC4A7	solute carrier family 4, sodium bicarbonate cotransporter, member 7	1.82±0.06	0.000439699
PLXND1	plexin D1	1.72±0.01	7.47e-06
IRF7	interferon regulatory factor 7	2.97±0.64	0.015399
MXD1	MAX dimerization protein 1	1.79±0.15	0.000952363
NANOS1	nanos homolog 1 (Drosophila)	1.85±0.06	0.0604358
SP100	SP100 nuclear antigen	1.63±0.1	0.00172602
ZCCHC3	zinc finger, CCHC domain containing 3	1.88±0.12	0.00319985
TGFB2	transforming growth factor, beta 2	3.65±0.45	0.000788262
CXCL12	chemokine (C-X-C motif) ligand 12	1.9±0.02	4.67777e-06
KLF3	Kruppel-like factor 3 (basic)	1.74±0.1	0.000437948
ETV4	ets variant 4	1.95±0.22	0.0170439
AVIL	advillin	2.36±0.19	0.0247418
KRT18	keratin 18, type I	2.42±0.36	0.000441674
SLC6A6	solute carrier family 6 (neurotransmitter transporter), member 6	1.94±0.07	0.00135028
GOLGA6L6	golgin A6 family-like 6	1.63±0.06	0.0356071
KLHL24	kelch-like family member 24	1.63±0.05	0.00048795
TMED5	transmembrane emp24 protein transport domain containing 5	1.92±0.14	3.96561e-05
XAF1	XIAP associated factor 1	2.32±0.51	0.0119623
PPARA	peroxisome proliferator-activated receptor alpha	1.71±0.12	0.000338518
SLC25A37	solute carrier family 25 (mitochondrial iron transporter), member 37	1.65±0.12	0.0135692
FAM217B	family with sequence similarity 217, member B	1.86±0.24	0.0259598
FRMD8	FERM domain containing 8	1.56±0.08	0.00292097
HIPK2	homeodomain interacting protein kinase 2	2.5±0.15	0.00137726
HIST2H2AB	histone cluster 2, H2ab	1.66±0.08	0.00165311
LOC344887	NmrA-like family domain containing 1 pseudogene	1.69±0.16	0.072629
TLR4	toll-like receptor 4	1.69±0.06	0.00493424
ETS1	v-ets avian erythroblastosis virus E26 oncogene homolog 1	2.72±0.09	7.9706e-05
NEDD4L	neural precursor cell expressed, developmentally down-regulated 4-like, E3 ubiquitin protein ligase	2.19±0.57	0.0564871
MALL	mal, T-cell differentiation protein-like	2.41±0.41	0.00677862
SLC2A3	solute carrier family 2 (facilitated glucose transporter), member 3	2.53±0.22	0.00263868
BMP2K	BMP2 inducible kinase	1.65±0.15	0.00858235
PLEKHB2	pleckstrin homology domain containing, family B (evectins) member 2	1.64±0.03	0.000237144
C11orf95	chromosome 11 open reading frame 95	1.66±0.14	0.00191097
DCP2	decapping mRNA 2	3.77±0.27	9.11823e-05
SCG2	secretogranin II	2.32±0.11	0.0122108
SOX4	SRY (sex determining region Y)-box 4	2.38±0.27	0.000684829
HNMT	histamine N-methyltransferase	1.79±0.15	0.00128904
PTPRJ	protein tyrosine phosphatase, receptor type, J	2.23±0.14	7.42386e-05
MKNK2	MAP kinase interacting serine/threonine kinase 2	1.62±0.02	8.11189e-05
CNOT6	CCR4-NOT transcription complex, subunit 6	1.91±0.19	0.00903464
FAM3C	family with sequence similarity 3, member C	1.7±0.07	0.00127162
FAM60A	family with sequence similarity 60, member A	2.26±0.53	0.00986277
FGD6	FYVE, RhoGEF and PH domain containing 6	2.29±0.11	0.000805526
PKDCC	protein kinase domain containing, cytoplasmic	1.95±0.16	0.00102061
DENND6A	DENN/MADD domain containing 6A	1.83±0.09	0.000887205
DOK3	docking protein 3	1.96±0.05	0.0127411
ACVR2B	activin A receptor, type IIB	1.98±0.43	0.0140917
GDF6	growth differentiation factor 6	2.12±0.35	0.00719322
KRT18	keratin 18, type I	1.62±0.04	0.0014293
NEDD4	neural precursor cell expressed, developmentally down-regulated 4, E3 ubiquitin protein ligase	1.81±0.09	0.00162074
LINC00520	long intergenic non-protein coding RNA 520	1.65±0.11	0.00231169
ATAD2B	ATPase family, AAA domain containing 2B	1.61±0.06	0.00620904
ZBTB34	zinc finger and BTB domain containing 34	2.17±0.11	5.17687e-06
ZNF697	zinc finger protein 697	1.83±0.16	0.000831493
CITED4	Cbp/p300-interacting transactivator, with Glu/Asp-rich carboxy-terminal domain, 4	1.75±0.21	0.000456532
E2F7	E2F transcription factor 7	2.12±0.07	0.000361367
KIAA1549	KIAA1549	1.57±0.03	0.00171924
LOC100129781	uncharacterized LOC100129781	1.62±0.11	0.00149231
RASEF	RAS and EF-hand domain containing	2.13±0.2	0.00121836
PPP1R9A	protein phosphatase 1, regulatory subunit 9A	2.14±0.55	0.032133
LGALS9C	lectin, galactoside-binding, soluble, 9C	1.97±0.05	9.52343e-05
SLC2A14	solute carrier family 2 (facilitated glucose transporter), member 14	3.05±0.31	0.000626565
BRWD3	bromodomain and WD repeat domain containing 3	2.9±0.59	0.00053326
RPS6KA3	ribosomal protein S6 kinase, 90kDa, polypeptide 3	1.67±0.09	0.000358352
TNFAIP8L3	tumor necrosis factor, alpha-induced protein 8-like 3	1.7±0.1	0.00247768
F2RL2	coagulation factor II (thrombin) receptor-like 2	2.06±0.07	6.26708e-06
OTUD1	OTU deubiquitinase 1	1.68±0.06	0.00131237
PAG1	phosphoprotein membrane anchor with glycosphingolipid microdomains 1	1.76±0.06	4.39438e-05
LOC101928433	uncharacterized LOC101928433	1.77±0.19	0.000327864
TLR4	toll-like receptor 4	1.68±0.12	0.00144417
LOC646626	uncharacterized LOC646626	1.79±0.1	0.00815223
HEY1	hes-related family bHLH transcription factor with YRPW motif 1	2.49±0.87	0.0340376
LOC730257	uncharacterized LOC730257	2±0.29	0.00440954
ALPK3	alpha-kinase 3	1.89±0.14	0.0125924
ETV6	ets variant 6	1.61±0.04	0.000425481
DBNL	drebrin-like	2.66±0.4	0.00489527
PDCD4	programmed cell death 4 (neoplastic transformation inhibitor)	1.7±0.12	0.00024945
TFPI	tissue factor pathway inhibitor (lipoprotein-associated coagulation inhibitor)	1.65±0.07	0.00223047
RCC2	regulator of chromosome condensation 2	2.06±0.25	0.00179497
ASPN	asporin	2.98±0.61	0.0153715
PAG1	phosphoprotein membrane anchor with glycosphingolipid microdomains 1	1.75±0.12	0.00218675
ZNF818P	zinc finger protein 818, pseudogene	1.74±0.27	0.0184205
CACFD1	calcium channel flower domain containing 1	1.59±0.15	0.0017435
MAFB	v-maf avian musculoaponeurotic fibrosarcoma oncogene homolog B	1.68±0.1	0.00427499
BST2	bone marrow stromal cell antigen 2	4.73±4.72	0.104768
ADAMTS10	ADAM metallopeptidase with thrombospondin type 1 motif, 10	2.05±0.33	0.0187361
HIPK2	homeodomain interacting protein kinase 2	2.23±0.2	0.00622952
SCARNA12	small Cajal body-specific RNA 12	1.95±0.08	0.00078114
OAS2	2'-5'-oligoadenylate synthetase 2, 69/71kDa	3.53±0.66	0.0022909
OAS2	2'-5'-oligoadenylate synthetase 2, 69/71kDa	2.52±0.54	0.00117278
GATSL3	GATS protein-like 3	1.64±0.04	0.00054442
GATSL3	GATS protein-like 3	1.55±0.05	0.00028184
SP100	SP100 nuclear antigen	1.6±0.08	8.77519e-05
ID4	inhibitor of DNA binding 4, dominant negative helix-loop-helix protein	2.55±0.56	0.0137896
MBTD1	mbt domain containing 1	1.8±0.13	0.000612207
ZSWIM4	zinc finger, SWIM-type containing 4	1.97±0.11	0.00705483
MT1X	metallothionein 1X	1.67±0.15	0.0204085
BMP2	bone morphogenetic protein 2	2±0.39	0.0241138
TET2	tet methylcytosine dioxygenase 2	1.67±0.21	0.0041142
SLC7A11	solute carrier family 7 (anionic amino acid transporter light chain, xc- system), member 11	1.88±0.16	0.0041132
PKDCC	protein kinase domain containing, cytoplasmic	1.98±0.13	0.0035046
C17orf59	chromosome 17 open reading frame 59	1.64±0.11	0.000213746
GXYLT1P3	glucoside xylosyltransferase 1 pseudogene 3	1.94±0.31	0.00238251
N4BP2L1	NEDD4 binding protein 2-like 1	1.6±0.05	0.0018719
MAT2B	methionine adenosyltransferase II, beta	1.59±0.07	0.00558636
NEFM	neurofilament, medium polypeptide	2.93±0.2	0.000936091
PCDH18	protocadherin 18	1.63±0.02	0.00108782
NIPA1	non imprinted in Prader-Willi/Angelman syndrome 1	1.7±0.18	0.00359382
RNF38	ring finger protein 38	1.69±0.12	5.34875e-05
GADD45G	growth arrest and DNA-damage-inducible, gamma	1.92±0.11	0.0140706
MYLIP	myosin regulatory light chain interacting protein	1.92±0.06	0.000269284
DCBLD1	discoidin, CUB and LCCL domain containing 1	1.78±0.13	0.00615648
C3orf80	chromosome 3 open reading frame 80	3.63±0.3	0.00261747
XAF1	XIAP associated factor 1	2.54±0.51	0.00323477
FBXO10	F-box protein 10	1.62±0.05	0.000106371
RHEBL1	Ras homolog enriched in brain like 1	1.78±0.07	0.00112061
KIAA1324	KIAA1324	1.64±0.03	0.00416307
SYTL1	synaptotagmin-like 1	1.64±0.1	0.0187121
ANKRD52	ankyrin repeat domain 52	1.58±0.07	0.00252683
SPRY1	sprouty homolog 1, antagonist of FGF signaling (Drosophila)	1.84±0.34	0.0198524
FBXL22	F-box and leucine-rich repeat protein 22	1.98±0.18	0.00281123
REC8	REC8 meiotic recombination protein	1.84±0.29	0.0261135
GSAP	gamma-secretase activating protein	1.88±0.29	0.0256339
NID1	nidogen 1	1.68±0.05	2.44603e-05
IFIT3	interferon-induced protein with tetratricopeptide repeats 3	2.66±0.53	0.00636267
SCARNA7	small Cajal body-specific RNA 7	1.99±0.12	0.00973759
CYP1B1	cytochrome P450, family 1, subfamily B, polypeptide 1	1.73±0.09	0.0443609
ABTB1	ankyrin repeat and BTB (POZ) domain containing 1	1.81±0.05	0.00122562
NR4A2	nuclear receptor subfamily 4, group A, member 2	2.26±0.27	0.0121201
RPL28	ribosomal protein L28	1.81±0.34	0.0322989
TBC1D8	TBC1 domain family, member 8 (with GRAM domain)	1.78±0.22	0.00501094
ADAM12	ADAM metallopeptidase domain 12	2.83±0.15	0.000967231
ADD3-AS1	ADD3 antisense RNA 1	2.09±0.12	0.00232918
FAM46C	family with sequence similarity 46, member C	1.61±0.08	0.00576349
MT1HL1	metallothionein 1H-like 1	1.99±0.18	0.00700156
HERC6	HECT and RLD domain containing E3 ubiquitin protein ligase family member 6	2.9±0.19	0.000940179
CFH	complement factor H	1.9±0.14	0.00221639
E2F7	E2F transcription factor 7	2.14±0.54	0.0278914
LYPLA2	lysophospholipase II	1.64±0.04	3.34179e-05
NUPL1	nucleoporin like 1	2.52±0.14	0.000363374
SLC18B1	solute carrier family 18, subfamily B, member 1	2.03±0.38	0.023462
PNRC2	proline-rich nuclear receptor coactivator 2	1.59±0.04	4.86961e-05
FIBIN	fin bud initiation factor homolog (zebrafish)	1.73±0.16	0.0115529
LRRC17	leucine rich repeat containing 17	1.77±0.03	0.0105498
ATP8A1	ATPase, aminophospholipid transporter (APLT), class I, type 8A, member 1	2.09±0.21	0.00555484
FGL2	fibrinogen-like 2	3.96±0.52	0.00245294
LCORL	ligand dependent nuclear receptor corepressor-like	1.75±0.24	0.0179258
SCARNA13	small Cajal body-specific RNA 13	6.03±0.7	0.00146966
LINC00704	long intergenic non-protein coding RNA 704	2.02±0.26	0.00210521
ZDHHC11	zinc finger, DHHC-type containing 11	2.17±0.3	0.0128438
PCDH7	protocadherin 7	1.7±0.05	0.000882291
CHRM2	cholinergic receptor, muscarinic 2	1.88±0.19	0.0199648
UCN	urocortin	1.79±0.25	0.0351396
ING3	inhibitor of growth family, member 3	1.67±0.1	0.000311457
ABTB1	ankyrin repeat and BTB (POZ) domain containing 1	1.73±0.16	0.00996289
IFITM10	interferon induced transmembrane protein 10	2.14±0.15	0.000495104
SEPP1	selenoprotein P, plasma, 1	1.84±0.23	0.0148527
MGP	matrix Gla protein	2.36±0.01	3.14112e-05
SCARNA10	small Cajal body-specific RNA 10	2.03±0.13	0.0028448
LOC100996412	uncharacterized LOC100996412	2.27±0.88	0.0119053
CFH	complement factor H	1.94±0.11	0.000983466
C6orf120	chromosome 6 open reading frame 120	1.54±0.04	0.00169606
LRRK2	leucine-rich repeat kinase 2	1.98±0.07	0.00103583
SAT1	spermidine/spermine N1-acetyltransferase 1	1.99±0.15	0.000838738
MAP3K5	mitogen-activated protein kinase kinase kinase 5	1.83±0.33	0.00994685
SESTD1	SEC14 and spectrin domains 1	1.88±0.12	0.000172624
SESTD1	SEC14 and spectrin domains 1	1.92±0.16	0.00169232
LYPLA2	lysophospholipase II	1.72±0.03	1.8067e-05
HLA-F	major histocompatibility complex, class I, F	1.81±0.19	0.0104367
NKIRAS2	NFKB inhibitor interacting Ras-like 2	1.54±0.03	0.0066444
AKR1B15	aldo-keto reductase family 1, member B15	4.28±0.52	6.91835e-05
BTN3A1	butyrophilin, subfamily 3, member A1	1.75±0.15	0.0107989
HELZ2	helicase with zinc finger 2, transcriptional coactivator	2.61±0.51	0.00165143
CMPK2	cytidine monophosphate (UMP-CMP) kinase 2, mitochondrial	4.94±2.07	0.0160012
MIR503HG	MIR503 host gene (non-protein coding)	2.34±0.11	0.00125764
IL4I1	interleukin 4 induced 1	2.21±0.34	0.00131486
ATXN1	ataxin 1	1.75±0.19	0.00475956
FZD6	frizzled class receptor 6	1.73±0.07	0.0038083
FAM43A	family with sequence similarity 43, member A	1.66±0.1	0.00600492
ERAP1	endoplasmic reticulum aminopeptidase 1	1.73±0.13	0.000132869
LAMB2P1	laminin, beta 2 pseudogene 1	2.02±0.13	0.0020648
CLCN5	chloride channel, voltage-sensitive 5	1.64±0.18	0.00712901
ODF3B	outer dense fiber of sperm tails 3B	2.35±0.22	0.00190144
ZFP36L1	ZFP36 ring finger protein-like 1	1.64±0.03	1.07701e-06
DDX58	DEAD (Asp-Glu-Ala-Asp) box polypeptide 58	2.25±0.42	0.00180647
LGALS9	lectin, galactoside-binding, soluble, 9	1.78±0.16	0.0051537
TP53INP1	tumor protein p53 inducible nuclear protein 1	2.13±0.28	0.0126236
KIAA1147	KIAA1147	1.66±0.09	0.00623756
TMEM164	transmembrane protein 164	1.81±0.12	0.00707233
IFITM1	interferon induced transmembrane protein 1	6.78±4.39	0.0357323
FLYWCH1	FLYWCH-type zinc finger 1	1.93±0.18	0.00121579
PANX2	pannexin 2	2.49±0.13	0.00015558
PRKXP1	protein kinase, X-linked, pseudogene 1	1.61±0.09	0.00187079
PMAIP1	phorbol-12-myristate-13-acetate-induced protein 1	2.28±0.2	0.00456362
COL5A1	collagen, type V, alpha 1	1.73±0.05	0.000429925
SNORA12	small nucleolar RNA, H/ACA box 12	2.65±0.31	0.00036236
HRK	harakiri, BCL2 interacting protein	1.59±0.08	0.000407723
FNIP2	folliculin interacting protein 2	1.67±0.03	0.000126517
POU2F2	POU class 2 homeobox 2	1.76±0.15	0.00473258
Β, Downregulated genes
Gene symbol	Gene name	Fold change	P-value
LOC100506860	uncharacterized LOC100506860	-2.38±0.49	0.00905384
DDAH1	dimethylarginine dimethylaminohydrolase 1	-1.66±0.14	0.00584028
LINC01013	long intergenic non-protein coding RNA 1013	-2.57±0.35	0.00202346
CDCA7L	cell division cycle associated 7-like	-1.64±0.15	0.00128881
LINC01085	long intergenic non-protein coding RNA 1085	-2.21±0.18	7.83599e-05
DCLK1	doublecortin-like kinase 1	-2.48±0.23	0.00439002
USB1	U6 snRNA biogenesis 1	-1.98±0.28	0.0407232
SNAR-F	small ILF3/NF90-associated RNA F	-2.15±0.54	0.140878
SNAR-B2	small ILF3/NF90-associated RNA B2	-2.07±0.57	0.162225
SNAR-D	small ILF3/NF90-associated RNA D	-2.04±0.6	0.186622
SNAR-G2	small ILF3/NF90-associated RNA G2	-2.06±0.52	0.159226
SNAR-H	small ILF3/NF90-associated RNA H	-2.09±0.6	0.162478
LINC00968	long intergenic non-protein coding RNA 968	-2.03±0.28	0.0183482
BZRAP1-AS1	BZRAP1 antisense RNA 1	-1.97±0.16	0.0209825
RAB30-AS1	RAB30 antisense RNA 1 (head to head)	-1.59±0.04	3.7234e-05
LOXL1-AS1	LOXL1 antisense RNA 1	-2.01±0.09	0.000157157
LOC100505940	uncharacterized LOC100505940	-2.05±0.2	0.00605288
BOLA3-AS1	BOLA3 antisense RNA 1 (head to head)	-2.1±0.28	0.000656342
MIR143HG	MIR143 host gene (non-protein coding)	-1.82±0.44	0.0740637
MIR143HG	MIR143 host gene (non-protein coding)	-1.89±0.24	0.0207139
LOC101929484	uncharacterized LOC101929484	-1.56±0.07	0.0013614
RAB30-AS1	RAB30 antisense RNA 1 (head to head)	-1.54±0.04	0.000744629
LOC100506159	uncharacterized LOC100506159	-1.95±0.31	0.0252135
LINC01534	long intergenic non-protein coding RNA 1534	-2.25±0.48	0.0278237
TMEM191B	transmembrane protein 191B	-1.75±0.08	0.00157523
LINC01085	long intergenic non-protein coding RNA 1085	-1.99±0.27	0.0142395
LOC100128340	uncharacterized LOC100128340	-2.05±0.45	0.0157702
LINC00578	long intergenic non-protein coding RNA 578	-1.86±0.27	0.0313338
SP2-AS1	SP2 antisense RNA 1	-2.44±0.66	0.0186876
GACAT2	gastric cancer associated transcript 2 (non-protein coding)	-2.31±0.19	0.00144216
HHIP	hedgehog interacting protein	-2.29±0.32	0.016787
LOC100507437	uncharacterized LOC100507437	-1.89±0.22	0.00876744
GDPGP1	GDP-D-glucose phosphorylase 1	-1.63±0.07	0.00808311
LINC01085	long intergenic non-protein coding RNA 1085	-2.06±0.34	0.0233493
KCNB1	potassium channel, voltage gated Shab related subfamily B, member 1	-2.29±0.91	0.100542
LINC00578	long intergenic non-protein coding RNA 578	-2.17±0.37	0.00819847
PDK3	pyruvate dehydrogenase kinase, isozyme 3	-1.65±0.15	0.000775071
LINC01444	long intergenic non-protein coding RNA 1444	-2.17±0.16	0.00140595
ATP2A1-AS1	ATP2A1 antisense RNA 1	-1.97±0.22	0.0118316
TMEM161B-AS1	TMEM161B antisense RNA 1	-1.56±0.01	8.87103e-05
ERICH6-AS1	ERICH6 antisense RNA 1	-1.7±0.13	0.00520638
HOXC-AS3	HOXC cluster antisense RNA 3	-1.68±0.12	0.0135476
SBF2-AS1	SBF2 antisense RNA 1	-1.69±0.13	0.00249989
ZNF883	zinc finger protein 883	-2.3±0.55	0.0153934
PCOLCE-AS1	PCOLCE antisense RNA 1	-2.2±0.24	0.0113199
MALAT1	metastasis associated lung adenocarcinoma transcript 1 (non-protein coding)	-1.7±0.21	0.135833
CASC5	cancer susceptibility candidate 5	-1.75±0.21	0.00421439
ROGDI	rogdi homolog (Drosophila)	-1.67±0.16	0.00353908
TBCD	tubulin folding cofactor D	-1.63±0.05	0.000437333
KRT34	keratin 34, type I	-1.69±0.16	0.0158473
GRP	gastrin-releasing peptide	-3.71±0.83	0.0108377
HAS2	hyaluronan synthase 2	-1.82±0.2	0.0705289
PLEKHA3	pleckstrin homology domain containing, family A (phosphoinositide binding specific) member 3	-2.16±0.16	5.49704e-05
WISP2	WNT1 inducible signaling pathway protein 2	-1.88±0.09	0.00112393
MAN1C1	mannosidase, alpha, class 1C, member 1	-1.56±0.06	0.000727033
HSPB7	heat shock 27kDa protein family, member 7 (cardiovascular)	-2.05±0.12	0.000137015
KIRREL3	kin of IRRE like 3 (Drosophila)	-1.74±0.33	0.00236438
CCDC59	coiled-coil domain containing 59	-1.69±0.03	0.000450675
FRY	furry homolog (Drosophila)	-1.99±0.04	0.0013674
WFDC1	WAP four-disulfide core domain 1	-2.87±0.58	0.00741262
RNF112	ring finger protein 112	-2.44±0.4	0.0115994
TK1	thymidine kinase 1, soluble	-1.8±0.11	0.000566
EPHA4	EPH receptor A4	-2.31±0.34	0.000853926
GSTT2	glutathione S-transferase theta 2 (gene/pseudogene)	-2.44±0.16	0.0025206
ZNF185	zinc finger protein 185 (LIM domain)	-2.44±0.14	0.000536957
KIT	v-kit Hardy-Zuckerman 4 feline sarcoma viral oncogene homolog	-2.38±0.1	0.000189435
CTNND2	catenin (cadherin-associated protein), delta 2	-1.83±0.16	0.0100084
ZNF300	zinc finger protein 300	-1.62±0.1	0.000306285
GNG10	guanine nucleotide binding protein (G protein), gamma 10	-1.67±0.11	0.00190522
GNG10	guanine nucleotide binding protein (G protein), gamma 10	-1.62±0.08	0.000119058
SMIM14	small integral membrane protein 14	-1.62±0.09	0.000150948
RGN	regucalcin	-1.78±0.24	0.000903382
PMVK	phosphomevalonate kinase	-1.98±0.05	1.39614e-06
TRIM63	tripartite motif containing 63, E3 ubiquitin protein ligase	-2.98±0.63	0.00161589
ADAMTSL4	ADAMTS-like 4	-1.77±0.17	0.00318441
UBE2T	ubiquitin-conjugating enzyme E2T	-1.88±0.05	0.000165142
CELF2	CUGBP, Elav-like family member 2	-1.68±0.11	0.00626433
TM7SF2	transmembrane 7 superfamily member 2	-1.66±0.11	0.000924723
GINS2	GINS complex subunit 2 (Psf2 homolog)	-1.78±0.15	0.00268107
ATP2B4	ATPase, Ca++ transporting, plasma membrane 4	-1.82±0.28	0.0137522
TOM1L1	target of myb1 (chicken)-like 1	-1.64±0.03	0.00222188
KLF2	Kruppel-like factor 2	-2.21±0.36	0.0166437
NDUFA13	NADH dehydrogenase (ubiquinone) 1 alpha subcomplex, 13	-2.82±0.05	1.77284e-06
KCNC4	potassium channel, voltage gated Shaw related subfamily C, member 4	-2.67±0.43	0.0090276
APOBEC3C	apolipoprotein B mRNA editing enzyme, catalytic polypeptide-like 3C	-1.55±0.04	0.00268125
SERHL2	serine hydrolase-like 2	-2.22±0.21	0.00274554
PTX3	pentraxin 3, long	-1.75±0.11	0.00920712
TMEM43	transmembrane protein 43	-2.33±0.1	0.000463675
CCNB1	cyclin B1	-1.58±0.09	0.00129745
RTN4IP1	reticulon 4 interacting protein 1	-1.7±0.09	0.00336258
CALU	calumenin	-2.82±0.24	0.00158546
CNN1	calponin 1, basic, smooth muscle	-2.43±0.28	0.00654317
CLSPN	claspin	-2.6±0.2	0.000710789
RAB11FIP2	RAB11 family interacting protein 2 (class I)	-1.84±0.03	3.33737e-05
ITGA7	integrin, alpha 7	-1.79±0.16	0.00689147
TUBA1B	tubulin, alpha 1b	-1.68±0.13	0.00472053
FAM222A	family with sequence similarity 222, member A	-1.89±0.39	0.0202887
SLC39A2	solute carrier family 39 (zinc transporter), member 2	-2.05±0.16	0.000168695
IDH2	isocitrate dehydrogenase 2 (NADP+), mitochondrial	-1.67±0.08	0.000567777
RAB40B	RAB40B, member RAS oncogene family	-1.94±0.05	3.7248e-05
PRADC1	protease-associated domain containing 1	-2.03±0.15	0.000101637
FERMT1	fermitin family member 1	-2.53±0.12	0.000189512
SEMA3B	sema domain, immunoglobulin domain (Ig), short basic domain, secreted, (semaphorin) 3B	-2.36±0.05	6.3106e-05
VGLL3	vestigial-like family member 3	-2.49±0.13	0.00119363
FAM114A1	family with sequence similarity 114, member A1	-1.9±0.05	0.000123761
CCDC167	coiled-coil domain containing 167	-1.57±0.06	0.00303555
BAALC	brain and acute leukemia, cytoplasmic	-3.09±0.25	0.00425785
CSGALNACT1	chondroitin sulfate N-acetylgalactosaminyltransferase 1	-1.57±0.02	0.0191281
CORO2A	coronin, actin binding protein, 2A	-1.96±0.21	0.00527547
AP3B1	adaptor-related protein complex 3, beta 1 subunit	-2.48±0.17	8.61104e-06
MUC1	mucin 1, cell surface associated	-1.63±0.12	0.0107833
ADRA2A	adrenoceptor alpha 2A	-1.75±0.15	0.011248
TUBA1A	tubulin, alpha 1a	-1.53±0.02	0.00298921
ADAT1	adenosine deaminase, tRNA-specific 1	-1.59±0.06	0.00262848
DZIP1	DAZ interacting zinc finger protein 1	-1.63±0.1	0.000110661
LNPEP	leucyl/cystinyl aminopeptidase	-1.61±0.1	0.00498426
ACOT4	acyl-CoA thioesterase 4	-1.82±0.19	0.00817337
CHRM2	cholinergic receptor, muscarinic 2	-1.88±0.12	0.00228326
SLC25A10	solute carrier family 25 (mitochondrial carrier; dicarboxylate transporter), member 10	-1.61±0.15	0.00982821
RAB33A	RAB33A, member RAS oncogene family	-1.57±0.06	0.0139736
OLFML1	olfactomedin-like 1	-1.65±0.1	0.00624645
EIF1AY	eukaryotic translation initiation factor 1A, Y-linked	-1.62±0.07	0.00341157
B4GALT2	UDP-Gal:betaGlcNAc beta 1,4- galactosyltransferase, polypeptide 2	-1.78±0.15	0.000147057
ACTA2	actin, alpha 2, smooth muscle, aorta	-1.68±0.14	0.00440008
PGA3	pepsinogen 3, group I (pepsinogen A)	-2.59±0.26	0.00584881
IGF2	insulin-like growth factor 2	-1.82±0.25	0.0151864
SUOX	sulfite oxidase	-1.8±0.23	0.000412528
FOXM1	forkhead box M1	-1.8±0.09	0.0011462
HVCN1	hydrogen voltage gated channel 1	-2.57±0.35	0.00878268
CUL4A	cullin 4A	-2.12±0.11	0.000790066
SUPT16H	suppressor of Ty 16 homolog (S. cerevisiae)	-2.8±0.35	0.000756892
ARL2BP	ADP-ribosylation factor-like 2 binding protein	-1.88±0.12	5.0107e-05
DHODH	dihydroorotate dehydrogenase (quinone)	-2.66±0.29	0.00479187
SNRNP25	small nuclear ribonucleoprotein 25kDa (U11/U12)	-2.04±0.19	0.00638843
B9D1	B9 protein domain 1	-1.61±0.06	0.00187504
TUBG1	tubulin, gamma 1	-1.69±0.07	0.00260868
TLE2	transducin-like enhancer of split 2	-1.79±0.32	0.0390731
DKK2	dickkopf WNT signaling pathway inhibitor 2	-2.38±0.95	0.0883328
NME5	NME/NM23 family member 5	-2.41±0.44	0.0137904
ADTRP	androgen-dependent TFPI-regulating protein	-1.69±0.13	0.00341144
SCIN	scinderin	-1.89±0.14	0.00274766
TNC	tenascin C	-1.99±0.16	0.00892539
ESRRA	estrogen-related receptor alpha	-9.61±1.87	0.00166918
MAGED4B	melanoma antigen family D, 4B	-1.76±0.15	0.000189023
BEX1	brain expressed, X-linked 1	-1.88±0.52	0.0327203
PTPLA	protein tyrosine phosphatase-like (proline instead of catalytic arginine), member A	-1.57±0.05	0.000474587
POLA2	polymerase (DNA directed), alpha 2, accessory subunit	-1.55±0.04	0.000226295
MCAM	melanoma cell adhesion molecule	-2.12±0.13	0.000600724
MANSC1	MANSC domain containing 1	-2.19±0.46	0.00958819
MYL2	myosin, light chain 2, regulatory, cardiac, slow	-1.73±0.15	0.00517677
POLE2	polymerase (DNA directed), epsilon 2, accessory subunit	-1.76±0.1	0.000469362
MMD	monocyte to macrophage differentiation-associated	-1.88±0.15	0.000291049
NRBP1	nuclear receptor binding protein 1	-1.63±0.13	0.000292254
RASSF2	Ras association (RalGDS/AF-6) domain family member 2	-1.7±0.14	0.0111482
TMEM191A	transmembrane protein 191A (pseudogene)	-1.66±0.11	0.00024575
PRLR	prolactin receptor	-2.26±0.14	0.00562406
CYFIP2	cytoplasmic FMR1 interacting protein 2	-2.07±0.57	0.013691
FAM134B	family with sequence similarity 134, member B	-2±0.1	0.000790811
SH2D4A	SH2 domain containing 4A	-2.11±0.31	0.0060123
OPLAH	5-oxoprolinase (ATP-hydrolysing)	-1.8±0.07	0.00128103
ALDH4A1	aldehyde dehydrogenase 4 family, member A1	-3.09±0.23	0.000100557
EBP	emopamil binding protein (sterol isomerase)	-1.68±0.16	0.00135291
NLGN1	neuroligin 1	-1.61±0.13	0.0317253
CLGN	calmegin	-1.72±0.09	2.21743e-05
REEP2	receptor accessory protein 2	-3.94±0.18	4.54936e-05
DSE	dermatan sulfate epimerase	-1.84±0.04	9.27303e-06
TUBB2A	tubulin, beta 2A class IIa	-2.96±0.03	5.34542e-07
LRP8	low density lipoprotein receptor-related protein 8, apolipoprotein e receptor	-2.21±0.24	0.00450435
CELF2	CUGBP, Elav-like family member 2	-1.7±0.16	0.002561
TMEM25	transmembrane protein 25	-2.74±0.22	0.000802555
ASIC1	acid sensing (proton gated) ion channel 1	-1.74±0.09	0.00130129
MDM1	Mdm1 nuclear protein homolog (mouse)	-1.64±0.12	0.00110193
F10	coagulation factor X	-2.18±0.18	0.00263228
DHRS12	dehydrogenase/reductase (SDR family) member 12	-1.69±0.08	0.00101838
GPR56	G protein-coupled receptor 56	-2.74±0.34	0.00589595
RAD51C	RAD51 paralog C	-1.63±0.05	0.000558889
MAP2K6	mitogen-activated protein kinase kinase 6	-2.1±0.07	6.3922e-05
ATP2A3	ATPase, Ca++ transporting, ubiquitous	-2.5±0.65	0.0200533
PAIP1	poly(A) binding protein interacting protein 1	-1.73±0.1	0.000630998
MBOAT7	membrane bound O-acyltransferase domain containing 7	-1.61±0.03	0.000188502
UHRF1	ubiquitin-like with PHD and ring finger domains 1	-2.08±0.39	0.00103089
PSMD1	proteasome (prosome, macropain) 26S subunit, non-ATPase, 1	-1.8±0.08	0.000231076
KDELR3	KDEL (Lys-Asp-Glu-Leu) endoplasmic reticulum protein retention receptor 3	-1.7±0.02	0.000111086
MEI1	meiosis inhibitor 1	-1.64±0.11	0.000312846
FGF5	fibroblast growth factor 5	-1.75±0.04	0.000942954
FGF1	fibroblast growth factor 1 (acidic)	-2.62±0.89	0.0390027
CDH6	cadherin 6, type 2, K-cadherin (fetal kidney)	-1.89±0.3	0.0156274
CEP70	centrosomal protein 70kDa	-1.71±0.04	0.000448772
CEP41	centrosomal protein 41kDa	-1.85±0.16	0.000207304
CCL26	chemokine (C-C motif) ligand 26	-2±0.37	0.0386265
EPB41L4B	erythrocyte membrane protein band 4.1 like 4B	-1.72±0.09	0.0264014
SVEP1	sushi, von Willebrand factor type A, EGF and pentraxin domain containing 1	-1.63±0.06	0.00598023
SUSD1	sushi domain containing 1	-4.03±0.86	0.00965753
SLC44A1	solute carrier family 44 (choline transporter), member 1	-1.54±0.04	0.000567247
TRO	trophinin	-2.11±0.34	0.00331453
CYB5R2	cytochrome b5 reductase 2	-1.91±0.14	0.010106
EXO1	exonuclease 1	-1.81±0.16	0.000338039
CAND2	cullin-associated and neddylation-dissociated 2 (putative)	-4.05±0.47	0.00215138
CDCA7	cell division cycle associated 7	-1.88±0.05	0.000538551
BRIX1	BRX1, biogenesis of ribosomes, homolog (S. cerevisiae)	-1.62±0.14	0.00306419
ACAD10	acyl-CoA dehydrogenase family, member 10	-1.96±0.51	0.0145798
NPR3	natriuretic peptide receptor 3	-2.55±0.34	0.0112414
FAIM	Fas apoptotic inhibitory molecule	-1.58±0.03	0.00110372
LINC01260	long intergenic non-protein coding RNA 1260	-1.69±0.15	0.000193496
TUBB6	tubulin, beta 6 class V	-1.87±0.06	0.000576989
CENPU	centromere protein U	-1.73±0.04	0.00294207
CD164	CD164 molecule, sialomucin	-2.08±0.09	0.000109978
MGARP	mitochondria-localized glutamic acid-rich protein	-1.91±0.41	0.00369188
PLGRKT	plasminogen receptor, C-terminal lysine transmembrane protein	-1.61±0.07	1.05161e-05
GOLGA4	golgin A4	-1.94±0.13	0.000919972
DDB1	damage-specific DNA binding protein 1, 127kDa	-2.78±0.1	3.44441e-05
LMNB1	lamin B1	-2.71±0.46	0.0015581
PSMD10	proteasome (prosome, macropain) 26S subunit, non-ATPase, 10	-1.77±0.07	0.00041024
HLA-DPB1	major histocompatibility complex, class II, DP beta 1	-2.21±0.13	5.66873e-05
DNAL1	dynein, axonemal, light chain 1	-1.65±0.06	0.00198546
HSP90B1	heat shock protein 90kDa beta (Grp94), member 1	-1.66±0.06	9.16333e-06
ARHGAP44	Rho GTPase activating protein 44	-1.84±0.12	0.00350885
TMEM98	transmembrane protein 98	-1.63±0.02	8.99866e-05
APLP1	amyloid beta (A4) precursor-like protein 1	-1.99±0.11	0.0021941
RBL1	retinoblastoma-like 1	-1.75±0.17	0.0160008
KCNJ6	potassium channel, inwardly rectifying subfamily J, member 6	-1.89±0.42	0.0394505
ZMYND10	zinc finger, MYND-type containing 10	-1.79±0.17	0.00690848
NEFH	neurofilament, heavy polypeptide	-1.89±0.18	0.00445246
KIAA1462	KIAA1462	-1.66±0.13	0.000365889
CEP72	centrosomal protein 72kDa	-1.76±0.21	0.0045776
FAM19A5	family with sequence similarity 19 (chemokine (C-C motif)-like), member A5	-2.23±0.17	0.00259258
HLCS	holocarboxylase synthetase (biotin-(proprionyl-CoA-carboxylase (ATP-hydrolysing)) ligase)	-1.94±0.07	0.000129266
CYB5R4	cytochrome b5 reductase 4	-1.86±0.04	0.00162313
ACAT2	acetyl-CoA acetyltransferase 2	-1.59±0.04	0.000473025
AGFG2	ArfGAP with FG repeats 2	-1.7±0.25	0.0139499
GAL3ST4	galactose-3-O-sulfotransferase 4	-1.8±0.31	0.0395057
AMPH	amphiphysin	-2.66±0.32	0.00291366
TUBB4B	tubulin, beta 4B class IVb	-1.71±0.12	0.0024045
ORC5	origin recognition complex, subunit 5	-1.72±0.02	1.0745e-05
RFTN1	raftlin, lipid raft linker 1	-1.82±0.11	0.00323119
CEP131	centrosomal protein 131kDa	-1.57±0.05	0.00191275
SRXN1	sulfiredoxin 1	-1.56±0.03	0.0242971
DMKN	dermokine	-1.63±0.02	0.00243515
DISP2	dispatched homolog 2 (Drosophila)	-1.69±0.1	0.000453488
TMPO	thymopoietin	-1.65±0.16	0.00438468
RNGTT	RNA guanylyltransferase and 5'-phosphatase	-1.6±0.05	0.000330764
SLC1A7	solute carrier family 1 (glutamate transporter), member 7	-1.67±0.17	0.000479527
ANKRD35	ankyrin repeat domain 35	-1.84±0.11	0.00265657
MYRIP	myosin VIIA and Rab interacting protein	-2.99±0.77	0.0149713
VPS4A	vacuolar protein sorting 4 homolog A (S. cerevisiae)	-1.61±0.1	5.94413e-05
MNS1	meiosis-specific nuclear structural 1	-1.87±0.31	0.0245104
IGF2R	insulin-like growth factor 2 receptor	-2.24±0.18	0.0030793
CRELD2	cysteine-rich with EGF-like domains 2	-1.91±0.06	1.41893e-06
ZCCHC24	zinc finger, CCHC domain containing 24	-1.72±0.06	0.00130595
APCDD1	adenomatosis polyposis coli down-regulated 1	-2.05±0.29	0.0248768
DHRS3	dehydrogenase/reductase (SDR family) member 3	-3.23±0.61	0.00161231
TMEM180	transmembrane protein 180	-2.3±0.65	0.0186519
KDM1B	lysine (K)-specific demethylase 1B	-1.63±0.07	0.00756784
POP1	processing of precursor 1, ribonuclease P/MRP subunit (S. cerevisiae)	-1.57±0.01	0.00134606
CDA	cytidine deaminase	-1.92±0.46	0.0181307
TMEM130	transmembrane protein 130	-2.29±0.6	0.0494441
TBC1D5	TBC1 domain family, member 5	-1.98±0.19	0.00344099
ANLN	anillin, actin binding protein	-1.68±0.09	0.00379172
NUDT7	nudix (nucleoside diphosphate linked moiety X)-type motif 7	-2.31±0.12	0.0013758
ADAMTS4	ADAM metallopeptidase with thrombospondin type 1 motif, 4	-1.87±0.17	0.00956048
NUFIP1	nuclear fragile X mental retardation protein interacting protein 1	-1.65±0.24	0.0479544
NTSR1	neurotensin receptor 1 (high affinity)	-1.81±0.31	0.0481169
CCDC85C	coiled-coil domain containing 85C	-1.85±0.08	0.000698446
DHCR24	24-dehydrocholesterol reductase	-1.74±0.07	0.000502737
PAOX	polyamine oxidase (exo-N4-amino)	-1.64±0.04	0.0005107
DIRAS1	DIRAS family, GTP-binding RAS-like 1	-1.55±0.01	0.000128943
WHSC1	Wolf-Hirschhorn syndrome candidate 1	-1.83±0.14	0.00580489
TLX2	T-cell leukemia homeobox 2	-2.9±0.86	0.0168681
MANEAL	mannosidase, endo-alpha-like	-1.98±0.3	0.0154404
LY6K	lymphocyte antigen 6 complex, locus K	-1.93±0.22	0.00142158
INIP	INTS3 and NABP interacting protein	-1.71±0.09	0.00250486
GTF3C6	general transcription factor IIIC, polypeptide 6, alpha 35kDa	-1.81±0.02	0.000137878
DOK5	docking protein 5	-3±0.22	0.00128754
CTSZ	cathepsin Z	-2.41±0.39	0.017328
PFAS	phosphoribosylformylglycinamidine synthase	-1.67±0.13	0.00339531
YAE1D1	Yae1 domain containing 1	-1.69±0.09	0.00125125
MAPRE1	microtubule-associated protein, RP/EB family, member 1	-1.67±0.17	0.0137681
PRICKLE1	prickle homolog 1 (Drosophila)	-1.88±0.48	0.0266696
SMIM3	small integral membrane protein 3	-1.75±0.04	1.17309e-05
RAB37	RAB37, member RAS oncogene family	-2.06±0.07	0.000712011
NUDT14	nudix (nucleoside diphosphate linked moiety X)-type motif 14	-1.89±0.1	7.73948e-05
GALNT12	polypeptide N-acetylgalactosaminyltransferase 12	-1.94±0.13	0.0035936
CCDC136	coiled-coil domain containing 136	-2.29±0.1	0.000770658
GNAZ	guanine nucleotide binding protein (G protein), alpha z polypeptide	-3.57±0.45	1.84878e-05
LAMP2	lysosomal-associated membrane protein 2	-2.12±0.21	0.00120812
ACOT11	acyl-CoA thioesterase 11	-1.85±0.21	0.00745629
TSPYL5	TSPY-like 5	-1.78±0.22	0.00080763
C11orf45	chromosome 11 open reading frame 45	-1.81±0.34	0.0573941
TLCD1	TLC domain containing 1	-2.26±0.27	0.00513446
TMEM14A	transmembrane protein 14A	-1.69±0.11	0.000753482
KAZALD1	Kazal-type serine peptidase inhibitor domain 1	-2.06±0.15	0.00113967
FBXO36	F-box protein 36	-1.61±0.09	0.00112577
HLA-DMA	major histocompatibility complex, class II, DM alpha	-1.6±0.06	0.00374528
STEAP2	STEAP family member 2, metalloreductase	-1.92±0.06	0.000524483
CEP128	centrosomal protein 128kDa	-1.74±0.19	0.0172178
SPOCD1	SPOC domain containing 1	-1.81±0.17	0.0115717
SULF1	sulfatase 1	-1.98±0.16	0.00212329
MRGPRF	MAS-related GPR, member F	-1.69±0.1	0.00319647
PODNL1	podocan-like 1	-1.89±0.23	0.00815544
CARD10	caspase recruitment domain family, member 10	-2.98±0.36	0.00442663
RAB42	RAB42, member RAS oncogene family	-1.76±0.12	0.000391616
CRIP1	cysteine-rich protein 1 (intestinal)	-2.09±0.08	0.000702899
FBXO2	F-box protein 2	-2.42±0.49	0.0242026
LDHA	lactate dehydrogenase A	-1.58±0.03	0.000809584
PHLDA2	pleckstrin homology-like domain, family A, member 2	-1.61±0.09	3.9295e-05
UCP2	uncoupling protein 2 (mitochondrial, proton carrier)	-1.62±0.11	0.000352147
MAP6	microtubule-associated protein 6	-1.69±0.22	0.00122959
SALL2	spalt-like transcription factor 2	-2.61±0.49	0.00312436
CDKN3	cyclin-dependent kinase inhibitor 3	-1.61±0.02	0.000515429
C14orf159	chromosome 14 open reading frame 159	-1.6±0.1	0.00387398
ATP6V1G2	ATPase, H+ transporting, lysosomal 13kDa, V1 subunit G2	-2.22±0.17	1.83252e-05
TUB	tubby bipartite transcription factor	-1.68±0.1	0.00327001
PEX10	peroxisomal biogenesis factor 10	-1.77±0.09	0.000983054
SHMT1	serine hydroxymethyltransferase 1 (soluble)	-1.79±0.2	0.00579131
PINLYP	phospholipase A2 inhibitor and LY6/PLAUR domain containing	-2.12±0.52	0.0039724
PSG1	pregnancy specific beta-1-glycoprotein 1	-1.57±0.06	0.000337753
SERPINE2	serpin peptidase inhibitor, clade E (nexin, plasminogen activator inhibitor type 1), member 2	-1.65±0.03	0.000128857
SPC25	SPC25, NDC80 kinetochore complex component	-1.63±0.11	0.00452465
PRKCZ	protein kinase C, zeta	-2.03±0.08	0.000345968
NPM3	nucleophosmin/nucleoplasmin 3	-1.93±0.34	0.0216854
NAALADL1	N-acetylated alpha-linked acidic dipeptidase-like 1	-1.92±0.31	0.00968877
NFYB	nuclear transcription factor Y, beta	-1.77±0.11	0.000777122
COG6	component of oligomeric golgi complex 6	-1.65±0.13	0.000104922
GDE1	glycerophosphodiester phosphodiesterase 1	-1.62±0.05	0.00129804
LDHD	lactate dehydrogenase D	-3.07±0.69	0.0128302
TARS2	threonyl-tRNA synthetase 2, mitochondrial (putative)	-1.68±0.06	0.000101234
CCBE1	collagen and calcium binding EGF domains 1	-1.76±0.14	0.0044273
CHAF1B	chromatin assembly factor 1, subunit B (p60)	-1.92±0.11	0.0016904
NPR3	natriuretic peptide receptor 3	-2.89±0.3	0.00314123
PLTP	phospholipid transfer protein	-1.58±0.05	0.00170723
CCIN	calicin	-1.6±0.1	0.00788886
PRPF4	pre-mRNA processing factor 4	-2.19±0.17	0.000153531
PLCXD1	phosphatidylinositol-specific phospholipase C, X domain containing 1	-1.82±0.18	0.00168078
LRRC20	leucine rich repeat containing 20	-1.72±0.03	0.000294367
ATP6V0E2	ATPase, H+ transporting V0 subunit e2	-3.56±0.36	1.46371e-05
EXTL1	exostosin-like glycosyltransferase 1	-2.54±0.53	0.00347408
SDF2L1	stromal cell-derived factor 2-like 1	-1.73±0.11	8.6656e-05
PCSK7	proprotein convertase subtilisin/kexin type 7	-1.68±0.18	0.0200227
SYNJ2BP	synaptojanin 2 binding protein	-1.53±0.04	3.79704e-06
ITFG3	integrin alpha FG-GAP repeat containing 3	-1.6±0.09	0.00309034
KRT19	keratin 19, type I	-2.47±0.36	0.000147593
KCNN4	potassium channel, calcium activated intermediate/small conductance subfamily N alpha, member 4	-2.35±0.32	0.00180154
LMCD1	LIM and cysteine-rich domains 1	-1.73±0.3	0.0160901
CNGA3	cyclic nucleotide gated channel alpha 3	-2.4±0.31	0.0116968
TPX2	TPX2, microtubule-associated	-1.58±0.08	0.00220838
DNAJC28	DnaJ (Hsp40) homolog, subfamily C, member 28	-1.75±0.14	0.00191668
CDC25C	cell division cycle 25C	-2.21±0.55	0.0190415
CD83	CD83 molecule	-1.6±0.14	0.00173433
CETN2	centrin, EF-hand protein, 2	-1.55±0.02	5.62321e-06
ARAF	A-Raf proto-oncogene, serine/threonine kinase	-1.57±0.05	0.00118197
LRCH2	leucine-rich repeats and calponin homology (CH) domain containing 2	-2.04±0.19	0.00263233
SDC3	syndecan 3	-1.73±0.13	0.00208317
CD9	CD9 molecule	-1.97±0.19	0.00264683
GALNT16	polypeptide N-acetylgalactosaminyltransferase 16	-1.61±0.09	0.0148505
TUBB3	tubulin, beta 3 class III	-2.08±0.23	0.00112937
CRYM	crystallin, mu	-1.67±0.11	0.00204183
SLC47A2	solute carrier family 47 (multidrug and toxin extrusion), member 2	-2.81±0.96	0.0154592
FAM117A	family with sequence similarity 117, member A	-2.64±0.07	0.000108666
ALDOC	aldolase C, fructose-bisphosphate	-2.48±0.26	0.00370392
EHD3	EH-domain containing 3	-1.8±0.23	0.016702
LYPD6B	LY6/PLAUR domain containing 6B	-2.09±0.64	0.0110953
E2F1	E2F transcription factor 1	-1.79±0.27	0.00742408
FER1L4	fer-1-like family member 4, pseudogene (functional)	-2.18±0.55	0.0397431
NRM	nurim (nuclear envelope membrane protein)	-2.12±0.16	0.00413933
ME1	malic enzyme 1, NADP(+)-dependent, cytosolic	-1.65±0.04	0.00542957
SLC38A5	solute carrier family 38, member 5	-1.86±0.17	0.00796393
NFIA	nuclear factor I/A	-3.14±0.07	2.77006e-05
SELENBP1	selenium binding protein 1	-1.81±0.18	0.000501696
ANKRD65	ankyrin repeat domain 65	-2.35±0.39	0.00903878
KLHDC9	kelch domain containing 9	-1.62±0.06	0.00279042
MRPS21	mitochondrial ribosomal protein S21	-2.81±0.12	0.000663164
SLC44A3	solute carrier family 44, member 3	-2.05±0.58	0.00547196
GPER1	G protein-coupled estrogen receptor 1	-1.67±0.12	6.179e-05
SRPR	signal recognition particle receptor (docking protein)	-1.76±0.06	5.76871e-05
TAGLN	transgelin	-2.32±0.05	0.000179341
TAGLN	transgelin	-2.37±0.08	7.20887e-07
MCF2L	MCF.2 cell line derived transforming sequence-like	-1.83±0.1	0.00765822
ATL1	atlastin GTPase 1	-1.69±0.07	0.00226679
CLUHP3	clustered mitochondria (cluA/CLU1) homolog pseudogene 3	-1.85±0.32	0.0608202
COPS3	COP9 signalosome subunit 3	-1.73±0.03	1.47545e-05
CCL2	chemokine (C-C motif) ligand 2	-1.69±0.11	0.00611486
KRT32	keratin 32, type I	-2.24±0.45	0.0416995
TBXA2R	thromboxane A2 receptor	-2.17±0.13	0.000857106
MCM6	minichromosome maintenance complex component 6	-1.72±0.1	0.00110652
PXMP4	peroxisomal membrane protein 4, 24kDa	-1.74±0.14	0.00733283
GMPPB	GDP-mannose pyrophosphorylase B	-1.98±0.22	0.0112981
MFF	mitochondrial fission factor	-1.69±0.07	0.00105168
BCKDHB	branched chain keto acid dehydrogenase E1, beta polypeptide	-1.74±0.04	5.95805e-05
NACAD	NAC alpha domain containing	-3.49±0.34	6.29002e-05
ACO1	aconitase 1, soluble	-1.93±0.08	6.86305e-05
KRT17	keratin 17, type I	-4.03±0.94	0.0158181
ZCCHC17	zinc finger, CCHC domain containing 17	-3.32±0.19	0.00018274
GSTM5	glutathione S-transferase mu 5	-1.72±0.07	0.00363113
DRAM1	DNA-damage regulated autophagy modulator 1	-1.89±0.12	0.000404885
MEDAG	mesenteric estrogen-dependent adipogenesis	-3.22±0.22	0.000189193
C14orf142	chromosome 14 open reading frame 142	-1.74±0.19	0.00098668
HOMER2	homer homolog 2 (Drosophila)	-1.72±0.18	0.00120972
TIPIN	TIMELESS interacting protein	-1.67±0.06	0.000412604
AKT3	v-akt murine thymoma viral oncogene homolog 3	-2.17±0.1	0.000975108
FBXO27	F-box protein 27	-1.64±0.16	0.016622
ALDH5A1	aldehyde dehydrogenase 5 family, member A1	-2.49±0.27	0.00559734
CRIM1	cysteine rich transmembrane BMP regulator 1 (chordin-like)	-2.61±0.54	0.0187303
PEX13	peroxisomal biogenesis factor 13	-2.12±0.23	0.00137259
PSMD1	proteasome (prosome, macropain) 26S subunit, non-ATPase, 1	-1.73±0.09	0.00311983
CYP51A1	cytochrome P450, family 51, subfamily A, polypeptide 1	-2.17±0.06	0.00019493
RUVBL1	RuvB-like AAA ATPase 1	-1.75±0.11	0.000535434
LOC644189	acyl-CoA thioesterase 4 pseudogene	-1.68±0.16	0.000569279
HLA-DPB1	major histocompatibility complex, class II, DP beta 1	-1.89±0.1	0.00420236
EPDR1	ependymin related 1	-2.16±0.22	0.00480212
ESPNL	espin-like	-1.82±0.21	0.000386789
WASF3	WAS protein family, member 3	-2.18±0.11	2.94573e-05
ASPH	aspartate beta-hydroxylase	-1.74±0.13	0.000875196
PHF20	PHD finger protein 20	-2.94±0.07	5.49518e-05
IMPA1	inositol(myo)-1(or 4)-monophosphatase 1	-1.82±0.17	0.000186728
SVEP1	sushi, von Willebrand factor type A, EGF and pentraxin domain containing 1	-2.33±0.36	0.000886458
TMEM97	transmembrane protein 97	-1.59±0.05	0.00162292
FADS1	fatty acid desaturase 1	-1.98±0.08	0.0108071
PEX19	peroxisomal biogenesis factor 19	-2.2±0.03	5.50304e-05
SHMT1	serine hydroxymethyltransferase 1 (soluble)	-2.18±0.55	0.00771896
ACOT7	acyl-CoA thioesterase 7	-1.98±0.1	0.000882221
RDH5	retinol dehydrogenase 5 (11-cis/9-cis)	-2.24±0.11	0.000353131
DYNC1I1	dynein, cytoplasmic 1, intermediate chain 1	-2.03±0.22	0.000513071
DAG1	dystroglycan 1 (dystrophin-associated glycoprotein 1)	-1.93±0.05	6.94307e-06
ZNF365	zinc finger protein 365	-3.42±0.55	0.0091848
GPAM	glycerol-3-phosphate acyltransferase, mitochondrial	-2.3±0.13	0.00178016
KIF11	kinesin family member 11	-1.72±0.09	0.000942744
IL21R	interleukin 21 receptor	-2.09±0.14	0.000914835
EIF1AX	eukaryotic translation initiation factor 1A, X-linked	-3.04±0.14	0.000270357
RNF41	ring finger protein 41, E3 ubiquitin protein ligase	-1.92±0.25	0.000420543
SYT11	synaptotagmin XI	-2±0.16	0.000514602
FGF1	fibroblast growth factor 1 (acidic)	-2.17±0.35	0.0152086
DKK3	dickkopf WNT signaling pathway inhibitor 3	-1.92±0.06	5.28606e-05
IQCE	IQ motif containing E	-1.62±0.05	0.00167541
BHLHE40	basic helix-loop-helix family, member e40	-1.55±0.03	0.000653463
SLC2A10	solute carrier family 2 (facilitated glucose transporter), member 10	-1.75±0.06	0.000535246
CDCA7L	cell division cycle associated 7-like	-1.57±0	8.01199e-08
TBCD	tubulin folding cofactor D	-1.58±0.03	1.01885e-05
TMEM104	transmembrane protein 104	-1.64±0.1	0.00560193
ARHGEF25	Rho guanine nucleotide exchange factor (GEF) 25	-1.68±0.05	0.00590828
SPTBN4	spectrin, beta, non-erythrocytic 4	-2.17±0.23	0.00533765
RASSF4	Ras association (RalGDS/AF-6) domain family member 4	-2.33±0.08	0.0344092
CBX1	chromobox homolog 1	-3±0.16	2.37397e-06
PNMAL1	paraneoplastic Ma antigen family-like 1	-2.01±0.17	0.00222697
PHF20	PHD finger protein 20	-4.61±0.17	6.89261e-05
CBX1	chromobox homolog 1	-2.93±0.14	8.48869e-05
TENM2	teneurin transmembrane protein 2	-2.35±0.48	0.01347
PDPN	podoplanin	-1.99±0.3	0.0289759
MLEC	malectin	-1.77±0.12	0.00353031
PAK4	p21 protein (Cdc42/Rac)-activated kinase 4	-1.87±0.37	0.0237698
CAPS	calcyphosine	-1.67±0.12	0.0039494
KCNB1	potassium channel, voltage gated Shab related subfamily B, member 1	-2.57±0.1	0.0147811
PTK7	protein tyrosine kinase 7 (inactive)	-2.87±0.18	0.000284076
SNTA1	syntrophin, alpha 1	-1.58±0.07	0.000720764
SLC22A17	solute carrier family 22, member 17	-1.65±0.2	0.000469309
MLF1	myeloid leukemia factor 1	-1.9±0.08	0.000687336
RNF150	ring finger protein 150	-2.48±0.15	0.00134931
EFNB2	ephrin-B2	-3.51±0.57	0.00596246
HTR2A	5-hydroxytryptamine (serotonin) receptor 2A, G protein-coupled	-2.19±0.32	0.0105711
PSG8	pregnancy specific beta-1-glycoprotein 8	-1.57±0.05	0.00222774
DSEL	dermatan sulfate epimerase-like	-1.58±0.08	0.00384869
LYPD6	LY6/PLAUR domain containing 6	-1.91±0.48	0.0223122
RNF141	ring finger protein 141	-2.19±0.07	9.68449e-05
CFL2	cofilin 2 (muscle)	-2.87±0.39	5.10333e-05
CCZ1	CCZ1 vacuolar protein trafficking and biogenesis associated homolog (S. cerevisiae)	-1.84±0.12	0.00101064
CD164	CD164 molecule, sialomucin	-1.84±0.14	0.00056944
AP1G1	adaptor-related protein complex 1, gamma 1 subunit	-1.77±0.07	0.000772192
POLR3K	polymerase (RNA) III (DNA directed) polypeptide K, 12.3 kDa	-1.77±0.08	0.000282889
LRRC32	leucine rich repeat containing 32	-2.33±0.16	0.00124665
ORC5	origin recognition complex, subunit 5	-1.75±0.2	0.000319144
HMGN4	high mobility group nucleosomal binding domain 4	-1.72±0.16	0.000900327
PTGES	prostaglandin E synthase	-2.27±0.31	0.00661857
ATP2B4	ATPase, Ca++ transporting, plasma membrane 4	-1.65±0.05	0.00154724
OLFM1	olfactomedin 1	-1.83±0.14	0.00448294
PMEPA1	prostate transmembrane protein, androgen induced 1	-1.9±0.24	0.00314351
TGOLN2	trans-golgi network protein 2	-1.7±0.04	0.000499307
TMEM168	transmembrane protein 168	-1.86±0.07	9.87307e-05
ADCY7	adenylate cyclase 7	-2.82±0.21	7.27002e-06
SCOC	short coiled-coil protein	-1.58±0.03	0.00013381
ARF6	ADP-ribosylation factor 6	-1.74±0.14	0.00827735
YES1	YES proto-oncogene 1, Src family tyrosine kinase	-1.93±0.12	0.000486236
TCEAL7	transcription elongation factor A (SII)-like 7	-2.38±0.17	0.000585952
HLA-DMA	major histocompatibility complex, class II, DM alpha	-1.71±0.11	0.00598283
MTPN	myotrophin	-1.63±0.03	0.000207909
CREBL2	cAMP responsive element binding protein-like 2	-3.04±0.18	0.000884979
SLC39A11	solute carrier family 39, member 11	-2.29±0.25	0.000103878
SPRN	shadow of prion protein homolog (zebrafish)	-1.95±0.02	6.18742e-05
HYKK	hydroxylysine kinase	-3.02±0.41	6.84839e-05
FABP3	fatty acid binding protein 3, muscle and heart	-3.06±0.48	0.000128986
PTGS1	prostaglandin-endoperoxide synthase 1 (prostaglandin G/H synthase and cyclooxygenase)	-1.63±0.09	0.0224038
ALDH1B1	aldehyde dehydrogenase 1 family, member B1	-1.89±0.17	0.0017451
MEX3B	mex-3 RNA binding family member B	-1.57±0.07	0.00949022
NFIB	nuclear factor I/B	-3.14±0.62	0.00568847
PRLR	prolactin receptor	-1.55±0.03	0.032862
ARPC1A	actin related protein 2/3 complex, subunit 1A, 41kDa	-1.66±0.06	0.0014666
CCDC113	coiled-coil domain containing 113	-2.21±0.22	0.00260071
CBY1	chibby homolog 1 (Drosophila)	-1.76±0.14	0.00738302
BOLA3	bolA family member 3	-1.64±0.1	0.000194782
CD59	CD59 molecule, complement regulatory protein	-1.63±0.11	0.00264894
TMEM191B	transmembrane protein 191B	-1.68±0.03	0.000488152
TMEM127	transmembrane protein 127	-1.64±0.08	0.000968019
BDH2	3-hydroxybutyrate dehydrogenase, type 2	-1.95±0.15	0.00585009
TUBB8	tubulin, beta 8 class VIII	-2.24±0.08	9.54135e-07
C16orf93	chromosome 16 open reading frame 93	-1.68±0.02	0.000565995
GPX8	glutathione peroxidase 8 (putative)	-2±0.32	0.000852512
CALD1	caldesmon 1	-1.7±0.09	0.0011521
PABPC1L	poly(A) binding protein, cytoplasmic 1-like	-2.15±0.54	0.0212308
PCNXL3	pecanex-like 3 (Drosophila)	-1.66±0.06	0.000726804
CDS1	CDP-diacylglycerol synthase (phosphatidate cytidylyltransferase) 1	-1.89±0.36	0.00468529
PCYOX1	prenylcysteine oxidase 1	-1.95±0.06	0.000516082
TBC1D1	TBC1 (tre-2/USP6, BUB2, cdc16) domain family, member 1	-7.9±0.73	2.18739e-06
ZNF682	zinc finger protein 682	-1.82±0.21	0.0175497
SKA2	spindle and kinetochore associated complex subunit 2	-1.66±0.14	0.00039281
CHMP3	charged multivesicular body protein 3	-2±0.23	0.000607729
LINC00087	long intergenic non-protein coding RNA 87	-1.58±0.08	0.00639769
ANXA8L1	annexin A8-like 1	-1.85±0.12	0.00291756
FANCM	Fanconi anemia, complementation group M	-1.62±0.1	0.00328992
STYX	serine/threonine/tyrosine interacting protein	-2.28±0.05	7.22345e-07
PTGES3	prostaglandin E synthase 3 (cytosolic)	-2.29±0.07	0.000212717
TRIQK	triple QxxK/R motif containing	-1.79±0.16	0.00115607
TPM3	tropomyosin 3	-2.26±0.27	0.0113704
GPR155	G protein-coupled receptor 155	-1.6±0.15	0.000540146
LOC388242	coiled-coil domain containing 101 pseudogene	-1.84±0.13	0.00754684
ZFYVE9	zinc finger, FYVE domain containing 9	-2.59±0.37	0.00775407
ATP6V0E2-AS1	ATP6V0E2 antisense RNA 1	-1.66±0.18	0.0390857
LPPR4	lipid phosphate phosphatase-related protein type 4	-2.97±0.01	0.000283261
AKAP12	A kinase (PRKA) anchor protein 12	-1.88±0.07	0.00239303
PCYOX1	prenylcysteine oxidase 1	-2.13±0.06	1.93146e-06
LYRM7	LYR motif containing 7	-1.74±0.14	0.00159075
ALDH4A1	aldehyde dehydrogenase 4 family, member A1	-2.18±0.4	0.0130126
CLEC16A	C-type lectin domain family 16, member A	-1.71±0.12	0.000626234
CHAC2	ChaC, cation transport regulator homolog 2 (E. coli)	-1.57±0.05	0.015925
NEURL1B	neuralized E3 ubiquitin protein ligase 1B	-1.77±0.13	0.00234094
RIIAD1	regulatory subunit of type II PKA R-subunit (RIIa) domain containing 1	-2.64±0.82	0.0143029
LOC643406	uncharacterized LOC643406	-1.81±0.04	0.0139832
COL6A6	collagen, type VI, alpha 6	-1.56±0.03	0.000346734
CDH15	cadherin 15, type 1, M-cadherin (myotubule)	-2.36±0.53	0.00474468
SEMA3D	sema domain, immunoglobulin domain (Ig), short basic domain, secreted, (semaphorin) 3D	-2.15±0.14	0.00508566
FLG	filaggrin	-3.91±1.73	0.0031037
RNF152	ring finger protein 152	-1.62±0.06	0.00282249
NUPR1L	nuclear protein, transcriptional regulator, 1-like	-1.58±0.05	8.78992e-05
SGCD	sarcoglycan, delta (35kDa dystrophin-associated glycoprotein)	-1.69±0.13	0.00914679
PQLC2L	PQ loop repeat containing 2-like	-1.82±0.1	0.00236616
HNRNPU	heterogeneous nuclear ribonucleoprotein U (scaffold attachment factor A)	-2.15±0.18	0.000724979
KRT16P2	keratin 16 pseudogene 2	-5.46±0.41	0.000603741
PBK	PDZ binding kinase	-1.71±0.07	0.0006796
FAM161A	family with sequence similarity 161, member A	-1.63±0.05	0.00038102
LILRB3	leukocyte immunoglobulin-like receptor, subfamily B (with TM and ITIM domains), member 3	-2.11±0.32	0.0070304
TIMP4	TIMP metallopeptidase inhibitor 4	-2.12±0.24	0.00140435
TOMM5	translocase of outer mitochondrial membrane 5 homolog (yeast)	-1.79±0.01	1.28934e-05
C10orf107	chromosome 10 open reading frame 107	-1.89±0.18	0.0124118
FAM161A	family with sequence similarity 161, member A	-1.8±0.02	0.000165171
ZWINT	ZW10 interacting kinetochore protein	-1.65±0.08	0.00400142
KDELC2	KDEL (Lys-Asp-Glu-Leu) containing 2	-2.6±0.09	0.000326358
PI16	peptidase inhibitor 16	-1.59±0.06	0.00513884
DNAJC6	DnaJ (Hsp40) homolog, subfamily C, member 6	-2.16±0.22	0.000150822
OSCP1	organic solute carrier partner 1	-1.8±0.25	0.00646762
POP5	processing of precursor 5, ribonuclease P/MRP subunit (S. cerevisiae)	-1.79±0.15	0.0065112
RIMS1	regulating synaptic membrane exocytosis 1	-1.72±0.26	0.0330472
STEAP2	STEAP family member 2, metalloreductase	-2.13±0.61	0.00556669
CEP78	centrosomal protein 78kDa	-1.87±0.46	0.0696794
BMPER	BMP binding endothelial regulator	-1.75±0.15	0.00891857
PTRH1	peptidyl-tRNA hydrolase 1 homolog (S. cerevisiae)	-2.55±0.21	2.30395e-05
ZNF204P	zinc finger protein 204, pseudogene	-2.15±0.17	0.00872092
EIF1AX	eukaryotic translation initiation factor 1A, X-linked	-1.73±0.02	6.95086e-05
MRPL19	mitochondrial ribosomal protein L19	-1.62±0.05	0.00144
JAM2	junctional adhesion molecule 2	-2.59±0.39	0.00994609
F3	coagulation factor III (thromboplastin, tissue factor)	-2.2±0.4	0.00827956
SDSL	serine dehydratase-like	-1.69±0.05	8.42745e-05
CGREF1	cell growth regulator with EF-hand domain 1	-1.69±0.17	0.00688003
SLC17A9	solute carrier family 17 (vesicular nucleotide transporter), member 9	-2.12±0.11	0.00170202
TMEM54	transmembrane protein 54	-1.64±0.06	0.000274401
MYH10	myosin, heavy chain 10, non-muscle	-1.86±0.18	0.00108225
NCAM2	neural cell adhesion molecule 2	-1.7±0.11	0.0134889
CDKL2	cyclin-dependent kinase-like 2 (CDC2-related kinase)	-2.13±0.36	0.0221972
SDC3	syndecan 3	-1.76±0.21	0.00239581
ESRRA	estrogen-related receptor alpha	-10.14±1.54	4.57861e-05
KLHL30	kelch-like family member 30	-3.11±0.23	0.00112415
KLHL20	kelch-like family member 20	-2.98±0.17	0.00038762
IL11	interleukin 11	-1.95±0.11	0.000162482
HAAO	3-hydroxyanthranilate 3,4-dioxygenase	-2.79±0.53	0.00156634
TENM2	teneurin transmembrane protein 2	-2.21±0.35	0.0123038
IL1RN	interleukin 1 receptor antagonist	-2.6±1.01	0.0505632
DMKN	dermokine	-1.63±0.06	0.0052969
CCNE2	cyclin E2	-1.63±0.1	0.000960218
MPP1	membrane protein, palmitoylated 1, 55kDa	-1.62±0.16	0.0110705
OLFM1	olfactomedin 1	-1.93±0.31	0.00649632
SCAMP1	secretory carrier membrane protein 1	-1.81±0.17	0.00723426
JAM2	junctional adhesion molecule 2	-2.45±0.4	0.00928821
CDCA7L	cell division cycle associated 7-like	-1.87±0.21	0.00800767
RSPO4	R-spondin 4	-2.38±0.63	0.0102662
CRIP1	cysteine-rich protein 1 (intestinal)	-2.1±0.11	0.00123095
CYP2U1	cytochrome P450, family 2, subfamily U, polypeptide 1	-1.83±0.19	0.00062814
CEACAM7	carcinoembryonic antigen-related cell adhesion molecule 7	-2.28±0.55	0.00740985
INIP	INTS3 and NABP interacting protein	-1.84±0.17	0.000261633
HYKK	hydroxylysine kinase	-2.21±0.58	0.0321934
C12orf5	chromosome 12 open reading frame 5	-2.22±0.41	0.0193001
PCNA	proliferating cell nuclear antigen	-1.56±0.05	0.000212033
NFASC	neurofascin	-1.57±0.04	0.000798706
PLCB4	phospholipase C, beta 4	-1.7±0.15	0.0010388
DKK3	dickkopf WNT signaling pathway inhibitor 3	-1.81±0.17	0.0011853
CECR1	cat eye syndrome chromosome region, candidate 1	-1.62±0.06	0.00641527
LRRC3	leucine rich repeat containing 3	-1.86±0.31	0.00404195
SGCD	sarcoglycan, delta (35kDa dystrophin-associated glycoprotein)	-1.67±0.16	0.0175413
LIMS2	LIM and senescent cell antigen-like domains 2	-1.55±0.03	0.00764543
ABAT	4-aminobutyrate aminotransferase	-2.09±0.13	0.000907406
BAI2	brain-specific angiogenesis inhibitor 2	-1.85±0.1	0.00191328
BAI2	brain-specific angiogenesis inhibitor 2	-1.94±0.28	0.0164214
MFSD2A	major facilitator superfamily domain containing 2A	-2.04±0.05	0.000269592
C17orf107	chromosome 17 open reading frame 107	-1.79±0.14	0.00636833
FAM64A	family with sequence similarity 64, member A	-1.91±0.15	0.0018145
PIH1D2	PIH1 domain containing 2	-1.72±0.24	0.0396598
ANKRD2	ankyrin repeat domain 2 (stretch responsive muscle)	-1.72±0.24	0.0127653
TSPYL5	TSPY-like 5	-2.01±0.37	0.00192873
MFAP3L	microfibrillar-associated protein 3-like	-1.65±0.15	0.00164219
THY1	Thy-1 cell surface antigen	-1.68±0.07	0.000593314
TMEM104	transmembrane protein 104	-1.89±0.07	6.84043e-05
B3GALT2	UDP-Gal:betaGlcNAc beta 1,3-galactosyltransferase, polypeptide 2	-3.02±0.73	0.0242569
CCDC136	coiled-coil domain containing 136	-2.04±0.16	0.00805644
GSTT2B	glutathione S-transferase theta 2B (gene/pseudogene)	-2.74±0.32	0.00192272
HBS1L	HBS1-like translational GTPase	-1.59±0.06	9.4311e-06
CPT1C	carnitine palmitoyltransferase 1C	-2.18±0.16	0.000693527
TMEM201	transmembrane protein 201	-1.91±0.14	0.000915569
KDELC2	KDEL (Lys-Asp-Glu-Leu) containing 2	-2.82±0.38	0.00237802
APITD1	apoptosis-inducing, TAF9-like domain 1	-1.57±0.09	8.3516e-05
CPOX	coproporphyrinogen oxidase	-2.05±0.12	0.00138978
ABHD8	abhydrolase domain containing 8	-1.71±0.08	0.0025642
DCLK1	doublecortin-like kinase 1	-2.08±0.3	0.00165829
KIT	v-kit Hardy-Zuckerman 4 feline sarcoma viral oncogene homolog	-2.51±0.59	0.0178335
PLEKHB1	pleckstrin homology domain containing, family B (evectins) member 1	-4.49±1.79	0.00570828
MRVI1	murine retrovirus integration site 1 homolog	-2.39±0.29	0.00360489
ZNF789	zinc finger protein 789	-1.63±0.11	0.0447914
ZNF789	zinc finger protein 789	-1.79±0.2	0.00676924
YAF2	YY1 associated factor 2	-1.65±0.07	0.000183347
SPEF2	sperm flagellar 2	-1.85±0.04	0.0145061
CYB5R4	cytochrome b5 reductase 4	-1.68±0.13	0.00661097
METTL20	methyltransferase like 20	-1.68±0.06	0.0026329
FDX1L	ferredoxin 1-like	-1.66±0.05	0.00104532
ZNF833P	zinc finger protein 833, pseudogene	-1.75±0.34	0.0101601
CUL4A	cullin 4A	-1.8±0.06	0.000727923
CEND1	cell cycle exit and neuronal differentiation 1	-4.29±0.36	2.54072e-06
SAMD12	sterile alpha motif domain containing 12	-1.8±0.25	0.022034
MOK	MOK protein kinase	-1.79±0.03	7.5558e-05
PLCE1-AS1	PLCE1 antisense RNA 1	-4.1±0.79	0.000129622
SH3BGR	SH3 domain binding glutamate-rich protein	-1.72±0.16	0.00615733
FASN	fatty acid synthase	-1.71±0.09	0.00533501
MAMSTR	MEF2 activating motif and SAP domain containing transcriptional regulator	-2.99±0.41	0.000815078
CDK2AP2	cyclin-dependent kinase 2 associated protein 2	-1.92±0.11	0.000972879
FAM180B	family with sequence similarity 180, member B	-1.9±0.33	0.0170267
LOC728392	uncharacterized LOC728392	-1.73±0.13	0.00626709
LINC00545	long intergenic non-protein coding RNA 545	-1.7±0.14	0.0138913
CBX1	chromobox homolog 1	-2.79±0.17	3.99588e-06
CCZ1	CCZ1 vacuolar protein trafficking and biogenesis associated homolog (S. cerevisiae)	-1.87±0.11	0.0003629
PSMD10	proteasome (prosome, macropain) 26S subunit, non-ATPase, 10	-1.9±0.1	0.000688195
CLIC3	chloride intracellular channel 3	-3.12±0.37	0.000115262
TRIP13	thyroid hormone receptor interactor 13	-2.17±0.22	7.68273e-05
GINS4	GINS complex subunit 4 (Sld5 homolog)	-1.58±0.07	0.000644568
AKTIP	AKT interacting protein	-1.58±0.12	0.00493892
KRT14	keratin 14, type I	-7.27±1.87	0.00409371
GPER1	G protein-coupled estrogen receptor 1	-1.58±0.06	0.00220538
GPER1	G protein-coupled estrogen receptor 1	-1.67±0.04	9.29255e-05
INMT	indolethylamine N-methyltransferase	-1.95±0.3	0.0292551
C5orf24	chromosome 5 open reading frame 24	-1.89±0.08	2.46615e-05
SWAP70	SWAP switching B-cell complex 70kDa subunit	-3.11±0.1	1.14296e-05
BCKDHB	branched chain keto acid dehydrogenase E1, beta polypeptide	-1.89±0.18	0.00592199
FOXL1	forkhead box L1	-2.17±0.19	0.00507182
LCTL	lactase-like	-2.23±0.32	0.000557085
SCAMP1	secretory carrier membrane protein 1	-1.85±0.13	0.00484042
EIF1AX	eukaryotic translation initiation factor 1A, X-linked	-1.67±0.08	0.00294489
TUBG1	tubulin, gamma 1	-1.99±0.14	0.000542222
TUBB2A	tubulin, beta 2A class IIa	-2.45±0.12	0.000526167
ADPRH	ADP-ribosylarginine hydrolase	-1.76±0.19	0.0130111
FAM213B	family with sequence similarity 213, member B	-1.95±0.19	0.0079219
FAM167B	family with sequence similarity 167, member B	-1.74±0.1	0.0155014
HVCN1	hydrogen voltage gated channel 1	-2.36±0.64	0.0120063
BOLA3	bolA family member 3	-1.64±0.1	5.42397e-05
LMOD1	leiomodin 1 (smooth muscle)	-2.79±0.67	0.00892235
DNAJB5	DnaJ (Hsp40) homolog, subfamily B, member 5	-1.9±0.04	0.000183226
AMIGO1	adhesion molecule with Ig-like domain 1	-1.61±0.11	0.0222327
IMPA1	inositol(myo)-1(or 4)-monophosphatase 1	-1.87±0.26	0.00183899
PSG10P	pregnancy specific beta-1-glycoprotein 10, pseudogene	-2.25±0.28	0.00172826
PSG5	pregnancy specific beta-1-glycoprotein 5	-2.54±0.09	0.00367661
ADAMTS5	ADAM metallopeptidase with thrombospondin type 1 motif, 5	-1.71±0.17	0.000949769
PNMAL2	paraneoplastic Ma antigen family-like 2	-1.79±0.18	0.00247471
TMEM18	transmembrane protein 18	-1.77±0.12	0.000204327
FGF2	fibroblast growth factor 2 (basic)	-2.51±0.34	0.000494917
ATP6V1C1	ATPase, H+ transporting, lysosomal 42kDa, V1 subunit C1	-1.58±0.07	0.000509929
CLEC2A	C-type lectin domain family 2, member A	-2.63±0.32	0.00700893
CYB5R2	cytochrome b5 reductase 2	-1.93±0.12	0.0235473
PICALM	phosphatidylinositol binding clathrin assembly protein	-1.87±0.08	0.000356318
THSD4	thrombospondin, type I, domain containing 4	-2.15±0.66	0.0145383
PDLIM7	PDZ and LIM domain 7 (enigma)	-1.65±0.11	0.00471639
CYB5D1	cytochrome b5 domain containing 1	-1.97±0.13	0.000347755
PXMP4	peroxisomal membrane protein 4, 24kDa	-2.98±0.21	0.00141889
SKAP2	src kinase associated phosphoprotein 2	-1.68±0.14	0.00183282
SNAI3-AS1	SNAI3 antisense RNA 1	-1.79±0.12	0.000791807
TRIM46	tripartite motif containing 46	-2.55±0.75	0.00519858
CPT1C	carnitine palmitoyltransferase 1C	-2.39±0.09	7.4578e-05
PKMYT1	protein kinase, membrane associated tyrosine/threonine 1	-1.76±0.2	0.00249332
MMP27	matrix metallopeptidase 27	-2.18±0.17	0.00977559
SLC2A6	solute carrier family 2 (facilitated glucose transporter), member 6	-1.81±0.02	2.60282e-05
MAPK9	mitogen-activated protein kinase 9	-1.71±0.18	0.00934354
MED21	mediator complex subunit 21	-1.97±0.15	0.00309081
LURAP1	leucine rich adaptor protein 1	-1.73±0.09	0.000460948
PPP1R14A	protein phosphatase 1, regulatory (inhibitor) subunit 14A	-2.1±0.2	0.00954723
PSG2	pregnancy specific beta-1-glycoprotein 2	-1.57±0.06	0.00306534
CCDC59	coiled-coil domain containing 59	-1.78±0.03	0.000129978
ZNF300	zinc finger protein 300	-1.67±0.04	0.000435959
NFASC	neurofascin	-1.85±0.07	0.000170785
KIF24	kinesin family member 24	-1.96±0.57	0.0598059
PLCXD1	phosphatidylinositol-specific phospholipase C, X domain containing 1	-2.2±0.31	0.00807722
HSP90B1	heat shock protein 90kDa beta (Grp94), member 1	-1.77±0.07	2.90649e-05
UBASH3B	ubiquitin associated and SH3 domain containing B	-2.14±0.26	0.0109016
SCARB2	scavenger receptor class B, member 2	-3.39±0.1	3.83909e-05
DGCR11	DiGeorge syndrome critical region gene 11 (non-protein coding)	-1.69±0.15	0.000121197
TMEM121	transmembrane protein 121	-1.68±0.14	0.00181761
GPHN	gephyrin	-1.69±0.11	0.00210428
PRLR	prolactin receptor	-1.94±0.23	0.0131269
ENHO	energy homeostasis associated	-2.4±0.37	0.00133104
FGF2	fibroblast growth factor 2 (basic)	-2.49±0.35	0.000138016
SLC4A8	solute carrier family 4, sodium bicarbonate cotransporter, member 8	-1.71±0.2	0.000921245
XPNPEP2	X-prolyl aminopeptidase (aminopeptidase P) 2, membrane-bound	-2.04±0.42	0.0556385
CCDC152	coiled-coil domain containing 152	-2.35±0.08	0.00478107
ZWILCH	zwilch kinetochore protein	-1.61±0.03	8.76646e-05
TSPAN10	tetraspanin 10	-1.81±0.14	0.00442817
LOC285178	uncharacterized LOC285178	-1.67±0.19	0.0173227
SNAR-A3	small ILF3/NF90-associated RNA A3	-1.97±0.48	0.170367
CXCL14	chemokine (C-X-C motif) ligand 14	-3.19±0.61	0.000249929
PKI55	DKFZp434H1419	-1.97±0.19	0.00799239
FAM13A	family with sequence similarity 13, member A	-1.72±0.02	7.39696e-05
DPY19L3	dpy-19-like 3 (C. elegans)	-1.63±0.1	0.0177497
CAP2	CAP, adenylate cyclase-associated protein, 2 (yeast)	-1.61±0.14	0.0255358
LOC344967	acyl-CoA thioesterase 7 pseudogene	-2.13±0.21	0.0015252
ANGPTL2	angiopoietin-like 2	-1.75±0.11	0.000934052
B4GALNT1	beta-1,4-N-acetyl-galactosaminyl transferase 1	-3.44±0.06	9.56082e-06
KRT19P2	keratin 19 pseudogene 2	-2.51±0.41	0.00252024
MCM10	minichromosome maintenance complex component 10	-1.56±0.04	0.00142993
MPV17L	MPV17 mitochondrial membrane protein-like	-2.34±0.81	0.0632265
LINC00856	long intergenic non-protein coding RNA 856	-1.83±0.08	0.000778751
Data are presented as the mean of fold change ± SD.
